# Supplementary material for: The Global, Regional, and National Uterine Cancer Burden Attributable to High BMI from 1990 to 2019: A Systematic Analysis of the Global Burden of Disease Study 2019
Source: J Clin Med. 2023 Feb 27;12(5):1874. doi: 10.3390/jcm12051874 (PMC10003834; doi:10.3390/jcm12051874)
Supplement: Supplementary file 1 [file jcm-12-01874-s001.zip › Supplementary Table S1..xlsx]

## Sheet: Sheet1
Supplementary Table S1. Deaths, DALYs and PAFs of uterine cancer attributable to high BMI in global and SDI regions from 1990 to 2019
Characteristics	Global				High SDI				High-middle SDI				Middle SDI				Low-middle SDI				Low SDI
	All risk factors	High BMI	PAF		All risk factors	High BMI	PAF		All risk factors	High BMI	PAF		All risk factors	High BMI	PAF		All risk factors	High BMI	PAF		All risk factors	High BMI	PAF
	No. (95% UI)	No. (95% UI)	Percentage (95% UI)		No. (95% UI)	No. (95% UI)	Percentage (95% UI)		No. (95% UI)	No. (95% UI)	Percentage (95% UI)		No. (95% UI)	No. (95% UI)	Percentage (95% UI)		No. (95% UI)	No. (95% UI)	Percentage (95% UI)		No. (95% UI)	No. (95% UI)	Percentage (95% UI)
Deaths
1990	56130 (51104 to 60199)	17189 (10716 to 24552)	30.65 (19.42 to 43.94)		16876 (15873 to 17408)	6343 (4161 to 8803)	37.59 (24.74 to 51.92)		19519 (18330 to 20673)	7497 (4941 to 10266)	38.42 (25.44 to 52.55)		11809 (9280 to 13507)	2165 (1083 to 3636)	18.4 (9.38 to 30.76)		5566 (4587 to 6754)	832 (381 to 1484)	14.97 (6.99 to 26.19)		2322 (1838 to 2931)	340 (139 to 641)	14.63 (6.34 to 25.78)
1991	56790 (51572 to 61027)	17582 (11069 to 24934)	30.98 (19.67 to 44.15)		16878 (15832 to 17417)	6405 (4212 to 8898)	37.95 (24.99 to 52.18)		19860 (18744 to 21164)	7718 (5110 to 10510)	38.87 (25.81 to 52.64)		11979 (9418 to 13556)	2234 (1125 to 3745)	18.68 (9.46 to 31.04)		5668 (4681 to 6912)	865 (399 to 1548)	15.28 (7.31 to 26.27)		2368 (1861 to 3006)	348 (144 to 656)	14.71 (6.4 to 25.82)
1992	57735 (52479 to 61944)	18047 (11429 to 25561)	31.28 (19.87 to 44.53)		16883 (15831 to 17431)	6463 (4257 to 8965)	38.28 (25.34 to 52.45)		20244 (19135 to 21452)	7956 (5297 to 10768)	39.31 (26.22 to 52.98)		12309 (9660 to 13910)	2349 (1210 to 3892)	19.13 (9.9 to 31.37)		5837 (4846 to 7097)	908 (425 to 1597)	15.58 (7.51 to 26.64)		2424 (1911 to 2987)	358 (147 to 671)	14.78 (6.38 to 26.04)
1993	59403 (54110 to 63393)	18886 (11996 to 26457)	31.81 (20.28 to 44.85)		17072 (16003 to 17638)	6607 (4348 to 9120)	38.7 (25.69 to 52.77)		21329 (20269 to 22436)	8515 (5736 to 11441)	39.93 (26.73 to 53.86)		12511 (9927 to 14149)	2435 (1264 to 3996)	19.51 (10.18 to 32.09)		5981 (5000 to 7157)	948 (448 to 1671)	15.88 (7.81 to 27.16)		2470 (1951 to 3125)	368 (152 to 680)	14.89 (6.53 to 26.07)
1994	60507 (55589 to 64847)	19463 (12455 to 27218)	32.18 (20.67 to 45.29)		17109 (16024 to 17680)	6685 (4412 to 9224)	39.07 (25.94 to 53.19)		21937 (20840 to 23066)	8852 (5963 to 11859)	40.36 (27.32 to 54.35)		12752 (10112 to 14390)	2538 (1327 to 4135)	19.94 (10.47 to 32.24)		6144 (5152 to 7312)	995 (472 to 1734)	16.22 (7.99 to 27.54)		2523 (2014 to 3183)	379 (159 to 704)	15.02 (6.61 to 26.34)
1995	60893 (55610 to 65118)	19671 (12592 to 27606)	32.32 (20.83 to 45.39)		17287 (16162 to 17869)	6807 (4506 to 9388)	39.37 (26.22 to 53.51)		21752 (20583 to 22825)	8801 (5928 to 11810)	40.47 (27.58 to 54.3)		12958 (10329 to 14468)	2624 (1377 to 4286)	20.28 (10.8 to 32.62)		6274 (5214 to 7576)	1034 (496 to 1788)	16.49 (8.28 to 27.71)		2580 (2059 to 3234)	392 (164 to 722)	15.18 (6.67 to 26.44)
1996	61614 (55655 to 65228)	19873 (12708 to 27857)	32.27 (20.68 to 45.42)		17374 (16186 to 17980)	6889 (4559 to 9468)	39.65 (26.56 to 53.86)		21588 (20396 to 22562)	8703 (5840 to 11651)	40.32 (27.08 to 54.39)		13462 (10450 to 14804)	2774 (1457 to 4480)	20.65 (11.06 to 33.25)		6501 (5390 to 7674)	1086 (524 to 1872)	16.72 (8.41 to 28.07)		2645 (2118 to 3338)	406 (172 to 746)	15.35 (6.8 to 26.61)
1997	62504 (56672 to 66306)	20208 (12907 to 28517)	32.34 (20.92 to 45.35)		17523 (16293 to 18153)	7001 (4652 to 9616)	39.95 (26.87 to 54.16)		21487 (20287 to 22520)	8659 (5797 to 11669)	40.3 (27.28 to 54.23)		13920 (10707 to 15225)	2956 (1568 to 4777)	21.27 (11.58 to 33.63)		6801 (5624 to 8104)	1154 (559 to 1970)	16.98 (8.63 to 28.5)		2727 (2214 to 3431)	423 (181 to 784)	15.52 (6.91 to 26.91)
1998	63589 (57205 to 67151)	20622 (13153 to 29027)	32.44 (20.95 to 45.36)		17851 (16611 to 18493)	7177 (4787 to 9839)	40.2 (27.11 to 54.38)		21446 (20201 to 22363)	8631 (5787 to 11655)	40.25 (27.2 to 53.85)		14403 (10905 to 15796)	3134 (1682 to 5055)	21.8 (11.87 to 34.31)		7028 (5817 to 8258)	1220 (590 to 2075)	17.37 (8.89 to 28.85)		2813 (2283 to 3540)	444 (191 to 811)	15.77 (7.1 to 27.12)
1999	65408 (58737 to 69315)	21400 (13671 to 30017)	32.73 (21.2 to 45.76)		18302 (16975 to 18972)	7407 (4970 to 10089)	40.47 (27.34 to 54.56)		22097 (20749 to 23039)	8930 (6023 to 12006)	40.42 (27.47 to 54.05)		14884 (11297 to 16371)	3296 (1782 to 5226)	22.19 (12.27 to 34.66)		7198 (5932 to 8333)	1287 (634 to 2181)	17.89 (9.25 to 29.41)		2877 (2328 to 3587)	464 (199 to 846)	16.11 (7.31 to 27.72)
2000	66736 (59664 to 70776)	21957 (14063 to 30849)	32.92 (21.29 to 45.94)		18693 (17297 to 19382)	7622 (5118 to 10413)	40.77 (27.56 to 54.82)		22274 (20884 to 23345)	9003 (6053 to 12160)	40.43 (27.42 to 54.21)		15340 (11407 to 16950)	3462 (1867 to 5511)	22.61 (12.58 to 35.18)		7420 (6120 to 8704)	1364 (681 to 2271)	18.4 (9.71 to 29.98)		2957 (2386 to 3668)	487 (213 to 880)	16.46 (7.58 to 28.08)
2001	68007 (60958 to 72271)	22535 (14477 to 31509)	33.15 (21.43 to 46.16)		19128 (17682 to 19846)	7857 (5304 to 10676)	41.07 (27.82 to 55)		22451 (20857 to 23452)	9085 (6128 to 12193)	40.48 (27.54 to 54.29)		15720 (11733 to 17373)	3615 (1965 to 5755)	23.04 (12.8 to 35.59)		7617 (6377 to 8968)	1445 (734 to 2388)	18.98 (10.04 to 30.64)		3036 (2469 to 3759)	514 (229 to 920)	16.92 (7.9 to 28.39)
2002	69646 (62110 to 73944)	23303 (15054 to 32359)	33.48 (21.92 to 46.27)		19525 (17994 to 20289)	8071 (5464 to 10899)	41.34 (28.12 to 55.14)		22916 (21270 to 23933)	9312 (6318 to 12456)	40.64 (27.76 to 54.19)		16191 (12039 to 17850)	3812 (2085 to 5989)	23.59 (13.25 to 36.26)		7838 (6588 to 9134)	1545 (795 to 2514)	19.71 (10.6 to 31.57)		3121 (2541 to 3827)	545 (248 to 957)	17.44 (8.32 to 29)
2003	71278 (63525 to 75842)	24086 (15570 to 33401)	33.81 (22.05 to 46.78)		19830 (18286 to 20631)	8249 (5607 to 11117)	41.6 (28.43 to 55.37)		23467 (21613 to 24564)	9561 (6477 to 12843)	40.75 (27.87 to 54.64)		16768 (12241 to 18521)	4043 (2224 to 6307)	24.15 (13.71 to 36.89)		7959 (6765 to 9471)	1635 (865 to 2635)	20.55 (11.27 to 32.31)		3198 (2613 to 3901)	578 (268 to 1010)	18.05 (8.79 to 29.77)
2004	72157 (63744 to 76223)	24513 (15866 to 34139)	33.99 (22.23 to 46.84)		19941 (18322 to 20763)	8335 (5679 to 11188)	41.8 (28.68 to 55.55)		23535 (21486 to 24582)	9584 (6485 to 12944)	40.73 (27.79 to 54.49)		17300 (12673 to 19054)	4246 (2360 to 6641)	24.59 (14.04 to 37.48)		8053 (6839 to 9617)	1715 (912 to 2731)	21.29 (11.91 to 33.17)		3269 (2677 to 4021)	611 (290 to 1051)	18.66 (9.33 to 30.38)
2005	73562 (64459 to 77798)	25219 (16340 to 34958)	34.3 (22.6 to 47.32)		20298 (18623 to 21149)	8535 (5819 to 11437)	42.05 (28.97 to 55.84)		23858 (21680 to 24946)	9766 (6667 to 13113)	40.95 (28.08 to 54.68)		17734 (12905 to 19404)	4451 (2475 to 6830)	25.15 (14.53 to 38.09)		8261 (7086 to 9798)	1803 (976 to 2851)	21.82 (12.27 to 33.7)		3349 (2738 to 4148)	642 (315 to 1100)	19.16 (9.69 to 30.88)
2006	74151 (65227 to 78304)	25562 (16653 to 35373)	34.49 (22.66 to 47.43)		20560 (18816 to 21456)	8693 (5930 to 11628)	42.29 (29.24 to 56.04)		23489 (21287 to 24517)	9631 (6564 to 12931)	41.02 (28.09 to 54.44)		18103 (13053 to 19774)	4646 (2617 to 7136)	25.73 (14.85 to 38.65)		8493 (7305 to 10073)	1894 (1032 to 2981)	22.3 (12.69 to 34.2)		3443 (2799 to 4199)	675 (331 to 1151)	19.59 (10.11 to 31.3)
2007	75220 (65549 to 79501)	26148 (17122 to 36135)	34.78 (22.95 to 47.8)		20919 (19105 to 21861)	8893 (6081 to 11876)	42.51 (29.46 to 56.3)		23520 (21077 to 24652)	9683 (6586 to 12985)	41.18 (28.28 to 54.67)		18561 (13332 to 20249)	4862 (2758 to 7385)	26.26 (15.34 to 39.2)		8647 (7434 to 10507)	1981 (1088 to 3092)	22.9 (13.32 to 34.89)		3509 (2887 to 4325)	707 (359 to 1191)	20.12 (10.64 to 31.9)
2008	77052 (67091 to 81408)	27093 (17835 to 37408)	35.18 (23.25 to 47.96)		21401 (19542 to 22371)	9150 (6276 to 12211)	42.76 (29.74 to 56.62)		23947 (21408 to 25145)	9959 (6810 to 13401)	41.61 (28.72 to 55.18)		19191 (13617 to 20987)	5139 (2943 to 7831)	26.85 (15.94 to 39.78)		8835 (7660 to 10638)	2076 (1165 to 3219)	23.49 (13.71 to 35.39)		3611 (2963 to 4444)	743 (373 to 1252)	20.56 (11.03 to 32.27)
2009	78196 (67870 to 82641)	27820 (18331 to 38111)	35.6 (23.59 to 48.54)		21735 (19769 to 22742)	9351 (6444 to 12428)	43.03 (30.01 to 56.87)		24104 (21677 to 25311)	10111 (6921 to 13424)	41.97 (28.94 to 55.69)		19679 (13859 to 21506)	5397 (3167 to 8116)	27.5 (16.47 to 40.54)		8908 (7704 to 10727)	2155 (1220 to 3310)	24.18 (14.32 to 36.2)		3702 (3025 to 4511)	781 (398 to 1289)	21.07 (11.4 to 32.7)
2010	79572 (69249 to 84066)	28641 (18972 to 39137)	36.01 (23.97 to 48.86)		22153 (20118 to 23208)	9561 (6607 to 12723)	43.16 (30.18 to 56.92)		24434 (21977 to 25760)	10369 (7098 to 13768)	42.45 (29.41 to 56.21)		20001 (14144 to 21957)	5614 (3270 to 8411)	28.13 (16.99 to 41.17)		9119 (7920 to 11079)	2254 (1280 to 3416)	24.71 (14.87 to 36.74)		3795 (3104 to 4688)	818 (423 to 1349)	21.53 (11.88 to 33.27)
2011	80763 (71283 to 85732)	29415 (19536 to 40144)	36.44 (24.45 to 49.37)		22778 (20669 to 23829)	9868 (6793 to 13101)	43.32 (30.39 to 57.13)		24545 (22148 to 25819)	10520 (7250 to 13987)	42.88 (29.86 to 56.56)		20059 (14587 to 22144)	5764 (3384 to 8570)	28.8 (17.67 to 41.67)		9390 (8282 to 11603)	2373 (1387 to 3613)	25.27 (15.48 to 37.2)		3922 (3201 to 4888)	864 (453 to 1422)	22.01 (12.27 to 33.81)
2012	81778 (72860 to 86802)	30277 (20265 to 41148)	37.04 (24.93 to 50.03)		23332 (21108 to 24427)	10161 (7003 to 13522)	43.56 (30.63 to 57.32)		24679 (22412 to 25943)	10742 (7426 to 14264)	43.54 (30.5 to 57.14)		19916 (14877 to 21757)	5921 (3520 to 8709)	29.78 (18.41 to 42.58)		9678 (8387 to 11833)	2502 (1472 to 3746)	25.86 (15.81 to 37.84)		4103 (3333 to 5061)	922 (490 to 1519)	22.46 (12.75 to 34.3)
2013	82614 (74430 to 88076)	31147 (21053 to 42146)	37.71 (25.58 to 50.66)		23910 (21573 to 25076)	10475 (7245 to 13945)	43.82 (30.89 to 57.54)		24818 (22806 to 26030)	10976 (7626 to 14493)	44.23 (31 to 57.87)		19642 (15189 to 21507)	6049 (3662 to 8780)	30.83 (19.44 to 43.61)		9924 (8681 to 12331)	2636 (1569 to 3916)	26.55 (16.4 to 38.45)		4247 (3439 to 5236)	983 (534 to 1588)	23.13 (13.31 to 34.91)
2014	83309 (76013 to 90369)	31938 (21608 to 42938)	38.34 (26.18 to 51.43)		24436 (22083 to 25666)	10765 (7445 to 14315)	44.06 (31.06 to 57.77)		24813 (22965 to 26162)	11132 (7754 to 14675)	44.86 (31.64 to 58.41)		19288 (15667 to 21433)	6164 (3810 to 8753)	31.95 (20.57 to 44.58)		10278 (9020 to 12932)	2800 (1676 to 4170)	27.24 (17.02 to 39.14)		4418 (3595 to 5506)	1047 (574 to 1669)	23.68 (13.72 to 35.46)
2015	85229 (77888 to 94276)	33165 (22676 to 44852)	38.92 (26.78 to 51.82)		25110 (22691 to 26383)	11126 (7704 to 14717)	44.31 (31.29 to 57.97)		25523 (23705 to 27092)	11600 (8109 to 15180)	45.45 (32.17 to 59.23)		19205 (16066 to 21951)	6323 (3979 to 8973)	32.93 (21.43 to 45.57)		10743 (9312 to 13537)	2978 (1788 to 4382)	27.73 (17.49 to 39.66)		4570 (3727 to 5668)	1106 (601 to 1745)	24.2 (14.15 to 35.95)
2016	86614 (79398 to 95205)	34003 (23277 to 45700)	39.26 (27.15 to 52.19)		25618 (23122 to 26875)	11404 (7904 to 15070)	44.52 (31.6 to 58.19)		25660 (23854 to 27362)	11723 (8223 to 15421)	45.69 (32.32 to 59.66)		19405 (16451 to 22189)	6531 (4196 to 9250)	33.66 (22.18 to 46.26)		11117 (9619 to 13934)	3138 (1896 to 4587)	28.23 (17.81 to 40.08)		4734 (3883 to 5916)	1174 (651 to 1870)	24.77 (14.65 to 36.56)
2017	87556 (79955 to 97010)	34506 (23707 to 46322)	39.41 (27.33 to 52.45)		25697 (23165 to 27037)	11465 (7955 to 15123)	44.62 (31.8 to 58.29)		25616 (23718 to 27457)	11715 (8211 to 15458)	45.74 (32.53 to 59.86)		19787 (16713 to 23050)	6762 (4280 to 9560)	34.18 (22.64 to 46.99)		11464 (9833 to 14635)	3286 (1992 to 4809)	28.67 (18.25 to 40.66)		4909 (4035 to 6133)	1244 (692 to 1966)	25.31 (15.07 to 37.24)
2018	89484 (81959 to 99282)	35420 (24254 to 47687)	39.59 (27.37 to 52.6)		26094 (23480 to 27517)	11678 (8142 to 15375)	44.76 (31.85 to 58.42)		26003 (23964 to 28168)	11918 (8353 to 15658)	45.83 (32.35 to 59.82)		20349 (17199 to 23749)	7026 (4536 to 9809)	34.54 (22.93 to 47.3)		11842 (10166 to 14762)	3443 (2089 to 5006)	29.08 (18.52 to 41.09)		5111 (4137 to 6329)	1320 (744 to 2075)	25.79 (15.4 to 37.78)
2019	91641 (82389 to 101502)	36486 (25131 to 49165)	39.81 (27.64 to 52.67)		26632 (23999 to 28143)	11964 (8392 to 15777)	44.93 (31.89 to 58.62)		26426 (23965 to 28832)	12148 (8455 to 16245)	45.96 (32.48 to 59.7)		20954 (17525 to 24330)	7326 (4627 to 10444)	34.96 (23.36 to 47.66)		12247 (10429 to 15284)	3620 (2194 to 5248)	29.56 (19.05 to 41.58)		5296 (4320 to 6639)	1393 (792 to 2179)	26.28 (15.9 to 38.23)
DALYs
1990	1483286 (1317510 to 1612749)	444333 (276290 to 633114)	30 (18.97 to 43.08)		380071 (361656 to 395566)	146375 (96900 to 202687)	38.52 (25.62 to 52.63)		523238 (486388 to 558711)	199595 (130069 to 272533)	38.17 (25.27 to 52.46)		354191 (266902 to 409373)	64347 (31997 to 108978)	18.24 (9.21 to 30.59)		159433 (129511 to 193562)	23879 (10963 to 42615)	15.02 (7.06 to 26.35)		65371 (51431 to 82354)	9822 (4093 to 18346)	15.03 (6.64 to 26.35)
1991	1498144 (1330308 to 1618520)	454093 (284339 to 650456)	30.34 (19.08 to 43.38)		379482 (361039 to 395615)	147596 (97716 to 202966)	38.9 (26.03 to 52.89)		530896 (497140 to 565225)	205061 (134256 to 280496)	38.64 (25.65 to 52.36)		358132 (271058 to 409326)	66240 (33202 to 111822)	18.55 (9.3 to 30.94)		162020 (131165 to 195431)	24810 (11473 to 44628)	15.35 (7.33 to 26.54)		66615 (52092 to 83426)	10064 (4253 to 18798)	15.11 (6.71 to 26.42)
1992	1522582 (1360630 to 1641725)	466310 (294438 to 659341)	30.66 (19.47 to 43.8)		378593 (359714 to 394805)	148550 (98806 to 204269)	39.24 (26.33 to 53.16)		540972 (508711 to 574970)	211505 (140283 to 287786)	39.11 (25.87 to 52.79)		367013 (272966 to 416644)	69529 (35197 to 116232)	19 (9.73 to 31.25)		166804 (136164 to 199614)	26044 (12251 to 46222)	15.65 (7.55 to 26.94)		68171 (53657 to 84363)	10348 (4360 to 19229)	15.18 (6.7 to 26.6)
1993	1567180 (1400769 to 1683002)	489208 (310002 to 685988)	31.25 (19.79 to 44.35)		382409 (363206 to 398891)	151813 (101732 to 208149)	39.7 (26.73 to 53.75)		571561 (536873 to 604276)	227298 (151498 to 307714)	39.79 (26.48 to 53.62)		371880 (283547 to 420795)	71941 (36914 to 118795)	19.4 (10.08 to 32)		170824 (140062 to 202461)	27188 (12851 to 47774)	15.95 (7.81 to 27.31)		69440 (55189 to 87322)	10618 (4481 to 19614)	15.29 (6.82 to 26.67)
1994	1601196 (1435394 to 1723212)	505033 (321942 to 710337)	31.57 (20.17 to 44.69)		382355 (363295 to 398912)	153342 (103163 to 209795)	40.1 (27.13 to 54.11)		589391 (554405 to 622472)	236583 (158660 to 315470)	40.16 (26.98 to 54.23)		381249 (290173 to 428575)	75226 (38739 to 123226)	19.78 (10.27 to 32.18)		176112 (142693 to 207528)	28568 (13655 to 49767)	16.25 (8.01 to 27.7)		71001 (56874 to 89376)	10955 (4702 to 20221)	15.42 (6.93 to 26.93)
1995	1610615 (1441904 to 1733667)	509058 (324025 to 713664)	31.63 (20.4 to 44.44)		384894 (365066 to 401433)	155643 (104812 to 212335)	40.44 (27.47 to 54.35)		583061 (547430 to 614392)	234109 (157131 to 314018)	40.16 (27.25 to 54.05)		388743 (297067 to 434035)	77922 (40326 to 128736)	20.09 (10.59 to 32.42)		180216 (146066 to 214280)	29695 (14313 to 51665)	16.5 (8.25 to 27.85)		72571 (57944 to 90693)	11314 (4853 to 20617)	15.59 (7 to 27.1)
1996	1628029 (1441093 to 1736385)	512381 (325071 to 721200)	31.5 (20.15 to 44.59)		384912 (364676 to 402324)	156756 (105986 to 213708)	40.72 (27.72 to 54.59)		576226 (539240 to 606120)	229794 (154152 to 307761)	39.9 (26.65 to 53.93)		404156 (300237 to 448228)	82471 (43163 to 133736)	20.47 (10.89 to 33.13)		187155 (148811 to 220872)	31226 (14999 to 54256)	16.71 (8.35 to 28.23)		74407 (59301 to 92938)	11739 (5068 to 21413)	15.76 (7.16 to 27.25)
1997	1648313 (1447407 to 1753122)	519402 (327567 to 732405)	31.54 (20.28 to 44.47)		387207 (366756 to 404729)	158929 (107422 to 215106)	41.04 (28.08 to 54.85)		570424 (530015 to 601097)	226864 (151649 to 303925)	39.78 (26.89 to 53.69)		417159 (308611 to 459565)	87810 (46176 to 143896)	21.1 (11.34 to 33.53)		195658 (155542 to 231934)	33169 (16076 to 57404)	16.97 (8.62 to 28.66)		76644 (61509 to 96281)	12215 (5333 to 22069)	15.93 (7.26 to 27.52)
1998	1676807 (1464178 to 1785745)	529200 (335160 to 748103)	31.59 (20.28 to 44.58)		393202 (372545 to 411178)	162445 (109962 to 218869)	41.31 (28.3 to 55.06)		568548 (527125 to 597572)	225149 (150461 to 301485)	39.61 (26.65 to 53.47)		432829 (314886 to 478807)	93359 (49681 to 151738)	21.63 (11.59 to 34.27)		201994 (160168 to 237171)	35013 (17117 to 60243)	17.36 (8.86 to 29.1)		78952 (63563 to 98391)	12792 (5574 to 22911)	16.2 (7.41 to 27.71)
1999	1724532 (1491019 to 1841019)	549670 (349324 to 771663)	31.9 (20.56 to 44.99)		402306 (380415 to 421475)	167422 (113263 to 225864)	41.61 (28.61 to 55.28)		586774 (542625 to 617503)	233274 (156740 to 312611)	39.77 (26.79 to 53.37)		446753 (320808 to 496486)	98252 (52014 to 157483)	22.06 (12.06 to 34.67)		206650 (162533 to 239627)	36894 (18250 to 62281)	17.88 (9.24 to 29.75)		80719 (64907 to 99624)	13365 (5849 to 23951)	16.55 (7.63 to 28.21)
2000	1757159 (1525224 to 1871556)	563993 (360038 to 790785)	32.13 (20.76 to 45.07)		410233 (388166 to 429971)	172116 (116799 to 231870)	41.95 (28.96 to 55.56)		591678 (542068 to 622598)	235229 (158591 to 315409)	39.77 (26.9 to 53.52)		458500 (328405 to 508602)	103110 (55089 to 165681)	22.55 (12.44 to 35.2)		212617 (167379 to 246629)	39042 (19427 to 65472)	18.39 (9.67 to 30.27)		82756 (66537 to 101003)	14013 (6198 to 25127)	16.92 (7.89 to 28.66)
2001	1787673 (1546032 to 1907800)	579022 (371304 to 808451)	32.42 (20.9 to 45.38)		419711 (396731 to 440317)	177544 (121190 to 237781)	42.3 (29.34 to 55.9)		596327 (541386 to 627524)	237422 (160378 to 320795)	39.83 (27 to 53.6)		467816 (335317 to 522189)	107501 (58167 to 171202)	23.04 (12.7 to 35.77)		217552 (173418 to 251727)	41275 (20807 to 68613)	18.99 (10 to 30.84)		84834 (68541 to 103797)	14770 (6685 to 25765)	17.4 (8.28 to 29.17)
2002	1822549 (1566003 to 1944369)	598351 (385739 to 834334)	32.86 (21.39 to 45.87)		427917 (404917 to 449616)	182358 (124527 to 243409)	42.62 (29.68 to 56.24)		606630 (549103 to 641618)	243075 (164429 to 325190)	40.09 (27.23 to 53.48)		477024 (344822 to 531355)	112826 (60561 to 178651)	23.71 (13.25 to 36.55)		222547 (179004 to 257998)	43949 (22638 to 71564)	19.77 (10.64 to 31.73)		86987 (70028 to 106324)	15624 (7230 to 27131)	17.95 (8.72 to 29.59)
2003	1862639 (1596928 to 1992737)	619573 (399962 to 861771)	33.29 (21.67 to 46.38)		435901 (412082 to 458511)	187022 (128959 to 248693)	42.91 (30.03 to 56.55)		620451 (559707 to 655463)	249704 (169529 to 336316)	40.26 (27.33 to 53.88)		490492 (345550 to 546375)	119300 (65052 to 186699)	24.38 (13.8 to 37.39)		225175 (183861 to 260397)	46422 (24391 to 74839)	20.62 (11.28 to 32.52)		89110 (72801 to 108153)	16571 (7811 to 28490)	18.59 (9.2 to 30.39)
2004	1889919 (1622715 to 2014389)	632543 (409895 to 881219)	33.5 (21.89 to 46.48)		439538 (414378 to 462540)	189440 (131131 to 251295)	43.1 (30.16 to 56.76)		624068 (557263 to 658872)	250871 (169630 to 339111)	40.22 (27.36 to 53.88)		506046 (360391 to 559822)	125450 (68961 to 196153)	24.85 (14.12 to 37.95)		227686 (185177 to 263070)	48685 (25855 to 77874)	21.38 (11.93 to 33.33)		91026 (74262 to 110923)	17517 (8410 to 30071)	19.23 (9.7 to 31.12)
2005	1929675 (1648926 to 2065932)	652718 (422360 to 906771)	33.86 (22.3 to 46.86)		448697 (421924 to 472720)	194605 (134223 to 259088)	43.37 (30.45 to 57.06)		634475 (561512 to 671796)	256307 (173363 to 346315)	40.42 (27.47 to 54.13)		519094 (363756 to 574298)	131679 (72647 to 201649)	25.44 (14.59 to 38.61)		232781 (190986 to 270665)	51111 (27630 to 80984)	21.96 (12.43 to 33.95)		93018 (76057 to 113794)	18408 (9066 to 30995)	19.78 (10.21 to 31.7)
2006	1943084 (1654390 to 2066708)	661044 (429460 to 916143)	34.06 (22.29 to 47.15)		455286 (428083 to 480025)	198687 (137168 to 264290)	43.64 (30.7 to 57.25)		622506 (548622 to 657585)	251408 (170052 to 337936)	40.42 (27.36 to 54.01)		530029 (366271 to 583525)	137376 (76424 to 211939)	26 (14.91 to 39.09)		238309 (197743 to 275373)	53627 (29166 to 84453)	22.51 (12.82 to 34.49)		95324 (77381 to 115178)	19326 (9678 to 32799)	20.26 (10.62 to 32.14)
2007	1970924 (1669903 to 2097812)	676534 (438051 to 934502)	34.36 (22.61 to 47.34)		464488 (436420 to 490191)	203877 (141354 to 269895)	43.9 (30.97 to 57.51)		621818 (542421 to 658257)	251873 (170192 to 337483)	40.54 (27.6 to 54.11)		543880 (370536 to 597049)	143817 (80259 to 220285)	26.53 (15.37 to 39.8)		242000 (199653 to 282788)	56054 (30735 to 87134)	23.16 (13.48 to 35.33)		97053 (79462 to 117400)	20263 (10416 to 33706)	20.86 (11.24 to 32.83)
2008	2020130 (1695674 to 2149449)	702546 (460461 to 969824)	34.82 (22.97 to 47.84)		477203 (447486 to 504080)	210691 (146344 to 278316)	44.15 (31.2 to 57.81)		632659 (550576 to 672000)	259103 (176121 to 347111)	40.99 (28.05 to 54.78)		562297 (377965 to 622539)	152067 (85553 to 231705)	27.14 (15.97 to 40.46)		246524 (206238 to 288076)	58709 (32834 to 90582)	23.82 (13.98 to 35.85)		99710 (81643 to 119933)	21296 (10867 to 35142)	21.34 (11.6 to 33.24)
2009	2051126 (1722274 to 2187949)	722876 (476052 to 993889)	35.28 (23.42 to 48.32)		487637 (456727 to 514931)	216716 (150711 to 285303)	44.45 (31.49 to 58.07)		635314 (555455 to 675372)	262548 (178536 to 351094)	41.37 (28.31 to 55.05)		575739 (389594 to 636485)	159553 (90782 to 240500)	27.82 (16.57 to 41.33)		248438 (209048 to 290606)	60963 (34530 to 92237)	24.54 (14.57 to 36.65)		102233 (83210 to 123016)	22401 (11606 to 36669)	21.89 (12.03 to 33.79)
2010	2086143 (1755803 to 2218453)	744969 (494176 to 1016257)	35.74 (24.01 to 48.66)		498712 (466081 to 526590)	222282 (154416 to 292506)	44.57 (31.6 to 58.19)		642499 (560308 to 685110)	269017 (183236 to 357709)	41.9 (28.83 to 55.55)		583864 (392199 to 647573)	165678 (95607 to 247233)	28.47 (17.13 to 41.95)		254423 (214337 to 295661)	63794 (36442 to 95944)	25.08 (15.16 to 37.07)		104852 (85800 to 127904)	23488 (12399 to 38490)	22.39 (12.51 to 34.3)
2011	2111163 (1796091 to 2255435)	764437 (508686 to 1043741)	36.24 (24.35 to 49.07)		514743 (481509 to 543656)	230387 (160553 to 302966)	44.76 (31.81 to 58.32)		641757 (564977 to 683295)	271824 (185836 to 364164)	42.39 (29.24 to 56.25)		583612 (405405 to 647147)	169673 (98115 to 251882)	29.16 (17.83 to 42.52)		261036 (223839 to 310249)	67020 (39269 to 101653)	25.68 (15.71 to 37.79)		108212 (87990 to 134403)	24813 (13088 to 40161)	22.92 (13.02 to 34.85)
2012	2127059 (1832070 to 2289621)	784972 (527081 to 1061036)	36.93 (24.89 to 49.74)		526676 (492262 to 556201)	237172 (166494 to 311132)	45.03 (32.09 to 58.56)		641028 (570943 to 682808)	276414 (191513 to 366175)	43.15 (30.02 to 56.77)		576757 (414100 to 637364)	173722 (102789 to 256813)	30.2 (18.69 to 43.37)		267749 (226627 to 318118)	70451 (41785 to 104655)	26.32 (16.21 to 38.42)		113004 (90942 to 138588)	26469 (14295 to 42862)	23.41 (13.42 to 35.37)
2013	2139440 (1884520 to 2290716)	806558 (545509 to 1089717)	37.72 (25.58 to 50.54)		540820 (505534 to 572422)	245029 (172496 to 321871)	45.31 (32.37 to 58.77)		641348 (582176 to 682903)	281920 (195476 to 372451)	43.97 (30.84 to 57.54)		564692 (418391 to 619054)	176506 (106127 to 255789)	31.31 (19.75 to 44.29)		273789 (235715 to 328202)	74111 (44025 to 109296)	27.07 (16.8 to 39.07)		116885 (95241 to 143934)	28219 (15359 to 44909)	24.12 (14.03 to 35.97)
2014	2148562 (1920174 to 2324156)	826162 (563856 to 1114436)	38.46 (26.52 to 51.47)		554196 (517315 to 586076)	252500 (176639 to 331015)	45.56 (32.62 to 59.04)		637722 (587017 to 679320)	285311 (199726 to 376803)	44.74 (31.46 to 58.21)		550116 (427592 to 605199)	178831 (110035 to 252274)	32.51 (21.09 to 45.28)		282809 (243343 to 342874)	78625 (47204 to 115596)	27.8 (17.5 to 39.79)		121757 (99538 to 149194)	30092 (16620 to 47561)	24.69 (14.47 to 36.45)
2015	2191002 (1976166 to 2384105)	856944 (589915 to 1148433)	39.12 (26.99 to 52.09)		569289 (531138 to 602476)	261081 (183348 to 341132)	45.86 (32.75 to 59.31)		653869 (607932 to 696874)	296988 (207663 to 391412)	45.43 (32.06 to 59.08)		544674 (441212 to 609281)	182721 (114117 to 258646)	33.56 (21.86 to 46.39)		295196 (254043 to 361116)	83516 (50126 to 121858)	28.3 (17.93 to 40.27)		125945 (102285 to 155103)	31800 (17666 to 49529)	25.23 (14.93 to 37.1)
2016	2222241 (2015357 to 2427651)	878469 (606625 to 1175419)	39.54 (27.37 to 52.45)		582792 (544707 to 618027)	268694 (189434 to 350013)	46.11 (33.03 to 59.5)		654700 (610725 to 701371)	299295 (210374 to 395469)	45.72 (32.24 to 59.71)		547536 (447711 to 613953)	188006 (119390 to 266516)	34.34 (22.7 to 46.96)		304714 (263511 to 369834)	87880 (53298 to 128297)	28.85 (18.36 to 40.76)		130425 (106112 to 162244)	33732 (18875 to 53363)	25.84 (15.48 to 37.81)
2017	2241033 (2036545 to 2481176)	890158 (611734 to 1190581)	39.73 (27.63 to 52.7)		582880 (543571 to 617834)	269435 (190402 to 350671)	46.23 (33.05 to 59.67)		651475 (604797 to 706322)	298246 (207294 to 395814)	45.79 (32.41 to 59.98)		556395 (462289 to 632820)	194098 (123566 to 272439)	34.89 (23.1 to 47.68)		313123 (267483 to 388612)	91782 (56095 to 133716)	29.32 (18.78 to 41.4)		135032 (110091 to 168202)	35707 (20121 to 56089)	26.41 (15.98 to 38.48)
2018	2282279 (2067930 to 2518349)	911240 (625343 to 1213381)	39.93 (27.79 to 52.91)		588498 (546651 to 626366)	273006 (193875 to 354721)	46.39 (33.23 to 59.78)		659091 (608149 to 722396)	302573 (210346 to 399907)	45.91 (32.31 to 59.93)		569925 (465809 to 655056)	201003 (129567 to 280028)	35.28 (23.43 to 48.19)		322238 (274379 to 389669)	95902 (58648 to 139949)	29.77 (19.14 to 41.82)		140346 (113334 to 175030)	37837 (21467 to 58871)	26.92 (16.41 to 39.21)
2019	2329074 (2092947 to 2560886)	935961 (642880 to 1255462)	40.19 (28.03 to 53.07)		596794 (555850 to 636053)	277948 (196534 to 361673)	46.58 (33.49 to 60.06)		667941 (606211 to 735232)	307750 (213434 to 407394)	46.07 (32.5 to 59.83)		584639 (475787 to 674773)	208902 (131242 to 296042)	35.73 (24.07 to 48.45)		332222 (280870 to 404903)	100545 (61182 to 145823)	30.27 (19.65 to 42.24)		145258 (117902 to 181516)	39878 (22869 to 61395)	27.43 (16.87 to 39.6)
