# Supplementary material for: The Global, Regional, and National Uterine Cancer Burden Attributable to High BMI from 1990 to 2019: A Systematic Analysis of the Global Burden of Disease Study 2019
Source: J Clin Med. 2023 Feb 27;12(5):1874. doi: 10.3390/jcm12051874 (PMC10003834; doi:10.3390/jcm12051874)
Supplement: Supplementary file 1 [file jcm-12-01874-s001.zip › Supplementary Table S2..xlsx]

## Sheet: Sheet1
Supplementary Table S2. Burden of uterine cancer attributable to high BMI in 204 countries and territories
Characteristics	1990					2019					1990-2019
	Deaths cases	ASMR(/100k)	DALYs	ASDR(/100k)		Deaths cases	ASMR(/100k)	DALYs	ASDR(/100k)		EAPC in ASMR	EAPC in ASDR
	No. (95% UI)	No. (95% UI)	No. (95% UI)	No. (95% UI)		No. (95% UI)	No. (95% UI)	No. (95% UI)	No. (95% UI)		No. (95% CI)	No. (95% CI)
Afghanistan	17 (7 to 37)	0.47 (0.18 to 1.04)	518 (194 to 1130)	13.39 (5.06 to 28.84)		50 (25 to 94)	0.74 (0.37 to 1.45)	1625 (752 to 2897)	20.4 (10.19 to 38.17)		2.2 (1.52 to 2.88)	2.08 (1.42 to 2.74)
Albania	9 (5 to 17)	0.87 (0.49 to 1.58)	264 (152 to 422)	23.41 (13.68 to 38.35)		21 (12 to 36)	0.94 (0.55 to 1.59)	558 (335 to 897)	26.96 (16.07 to 42.09)		0.73 (0.51 to 0.94)	0.98 (0.75 to 1.2)
Algeria	24 (13 to 35)	0.42 (0.23 to 0.64)	641 (386 to 942)	9.86 (5.82 to 14.52)		59 (37 to 85)	0.39 (0.25 to 0.56)	1580 (992 to 2298)	9.07 (5.77 to 13.19)		0.01 (-0.22 to 0.25)	-0.15 (-0.33 to 0.03)
American Samoa	0 (0 to 1)	3.94 (2.57 to 6.1)	14 (9 to 21)	108.2 (71.33 to 164.82)		2 (1 to 2)	6.06 (3.71 to 8.57)	46 (28 to 63)	171.18 (106.68 to 237.06)		1.91 (1.7 to 2.13)	2.01 (1.81 to 2.22)
Andorra	0 (0 to 1)	1.27 (0.71 to 2.07)	8 (5 to 14)	30.71 (17.26 to 50.48)		1 (1 to 1)	1.25 (0.69 to 2)	22 (12 to 35)	31.99 (17.97 to 51.31)		-0.02 (-0.29 to 0.24)	0.15 (-0.07 to 0.36)
Angola	4 (1 to 9)	0.18 (0.04 to 0.47)	110 (23 to 276)	4.85 (1.01 to 12.34)		31 (15 to 53)	0.49 (0.23 to 0.85)	935 (445 to 1591)	13.15 (6.34 to 22.41)		3.78 (3.55 to 4.01)	3.74 (3.51 to 3.98)
Antigua and Barbuda	0 (0 to 0)	0.97 (0.54 to 1.5)	7 (4 to 11)	27.03 (15.47 to 40.94)		1 (1 to 2)	2.37 (1.54 to 3.38)	34 (23 to 48)	61.05 (39.85 to 86.15)		2.8 (2.52 to 3.08)	2.51 (2.26 to 2.77)
Argentina	190 (105 to 289)	1.05 (0.57 to 1.61)	4697 (2568 to 7088)	26.28 (14.36 to 39.62)		348 (226 to 483)	1.13 (0.75 to 1.56)	7952 (5233 to 11109)	27.58 (18.16 to 38.49)		-0.17 (-0.38 to 0.03)	-0.25 (-0.42 to -0.08)
Armenia	21 (13 to 29)	1.3 (0.84 to 1.84)	605 (399 to 849)	36.94 (24.34 to 51.95)		46 (32 to 64)	1.94 (1.32 to 2.66)	1209 (816 to 1641)	51.84 (34.99 to 70.59)		1.63 (1.46 to 1.79)	1.41 (1.26 to 1.57)
Australia	116 (73 to 166)	1.06 (0.68 to 1.51)	2644 (1679 to 3767)	25.53 (16.17 to 36.15)		274 (194 to 359)	1.2 (0.86 to 1.57)	5846 (4183 to 7608)	28.47 (20.46 to 36.76)		0.32 (0.19 to 0.46)	0.26 (0.11 to 0.41)
Austria	89 (55 to 126)	1.2 (0.74 to 1.72)	1965 (1223 to 2831)	30.05 (18.74 to 43.46)		96 (62 to 135)	0.92 (0.59 to 1.28)	2014 (1311 to 2814)	22.7 (15.02 to 31.57)		-0.89 (-0.97 to -0.81)	-0.95 (-1.02 to -0.88)
Azerbaijan	41 (25 to 59)	1.39 (0.86 to 1.99)	1224 (758 to 1757)	40.26 (25.12 to 57.7)		81 (49 to 134)	1.55 (0.94 to 2.58)	2429 (1502 to 4005)	41.71 (25.72 to 68.23)		0.29 (-0.1 to 0.68)	-0.09 (-0.47 to 0.29)
Bahamas	2 (1 to 3)	2.12 (1.41 to 2.9)	57 (38 to 77)	60.65 (40.84 to 81.75)		6 (4 to 8)	2.63 (1.75 to 3.66)	165 (109 to 229)	72.91 (48.75 to 101.19)		1.06 (0.79 to 1.33)	0.92 (0.68 to 1.15)
Bahrain	1 (1 to 1)	1.25 (0.79 to 1.89)	28 (18 to 41)	31.15 (19.8 to 46.04)		5 (3 to 6)	1.32 (0.85 to 1.78)	146 (86 to 206)	31.96 (19.57 to 44.5)		0.24 (-0.1 to 0.57)	0.03 (-0.25 to 0.32)
Bangladesh	13 (2 to 38)	0.06 (0.01 to 0.18)	384 (62 to 1100)	1.65 (0.26 to 4.76)		91 (36 to 213)	0.14 (0.06 to 0.34)	2591 (1055 to 6169)	3.83 (1.55 to 9.1)		3.39 (3.14 to 3.64)	3.65 (3.36 to 3.93)
Barbados	4 (2 to 5)	2.25 (1.33 to 3.16)	88 (52 to 122)	59.77 (36.2 to 82.36)		10 (7 to 14)	3.77 (2.46 to 5.18)	249 (166 to 342)	97.68 (65.41 to 134.65)		2.08 (1.69 to 2.48)	1.95 (1.57 to 2.32)
Belarus	116 (76 to 160)	1.41 (0.92 to 1.95)	3095 (2042 to 4264)	38.57 (25.5 to 53.62)		116 (75 to 167)	1.16 (0.75 to 1.68)	2965 (1864 to 4270)	31.77 (19.94 to 45.98)		-1.47 (-2 to -0.94)	-1.53 (-2.09 to -0.98)
Belgium	93 (57 to 133)	1.01 (0.63 to 1.45)	2025 (1258 to 2879)	24.35 (15.23 to 34.59)		151 (97 to 211)	1.12 (0.72 to 1.54)	2991 (1922 to 4127)	26.43 (17.05 to 36.5)		0.21 (0.12 to 0.31)	0.19 (0.1 to 0.29)
Belize	1 (0 to 1)	1.48 (0.82 to 2.26)	19 (11 to 28)	39.68 (23.04 to 59.05)		3 (2 to 5)	2.49 (1.72 to 3.28)	106 (75 to 138)	68.15 (47.83 to 88.83)		1.66 (1.05 to 2.28)	1.62 (1.01 to 2.23)
Benin	5 (2 to 9)	0.5 (0.23 to 0.84)	141 (67 to 237)	13.14 (6.15 to 21.93)		22 (12 to 34)	0.89 (0.48 to 1.38)	612 (339 to 933)	22.58 (12.36 to 34.75)		2.19 (2.04 to 2.33)	2.02 (1.86 to 2.17)
Bermuda	1 (1 to 1)	2.23 (1.44 to 3.03)	20 (13 to 27)	55.78 (36.23 to 75.83)		1 (1 to 2)	1.69 (1.11 to 2.42)	27 (18 to 39)	42.37 (28.39 to 60.52)		-1.45 (-1.7 to -1.2)	-1.5 (-1.76 to -1.25)
Bhutan	0 (0 to 1)	0.23 (0.06 to 0.54)	8 (2 to 19)	6.08 (1.76 to 14.17)		1 (1 to 3)	0.46 (0.2 to 1.11)	33 (15 to 78)	11.47 (5.12 to 27.73)		2.48 (2.34 to 2.62)	2.18 (2.02 to 2.34)
Bolivia (Plurinational State of)	31 (17 to 50)	1.78 (0.94 to 2.88)	913 (499 to 1446)	49.24 (26.67 to 78.51)		117 (72 to 181)	2.55 (1.54 to 3.9)	3084 (1910 to 4734)	63.78 (39.28 to 98.26)		1.17 (1.12 to 1.23)	0.76 (0.71 to 0.82)
Bosnia and Herzegovina	24 (14 to 39)	1.02 (0.61 to 1.71)	654 (394 to 1032)	26.47 (15.88 to 42.08)		53 (33 to 77)	1.61 (1 to 2.34)	1320 (812 to 1922)	42.36 (25.63 to 62.13)		1.88 (1.49 to 2.27)	1.96 (1.58 to 2.34)
Botswana	3 (1 to 5)	0.88 (0.45 to 1.49)	75 (38 to 127)	22.18 (11.32 to 37.45)		15 (9 to 23)	2.05 (1.23 to 3.09)	391 (227 to 597)	48.13 (28.36 to 73.49)		2.93 (2.6 to 3.26)	2.69 (2.36 to 3.01)
Brazil	471 (284 to 688)	1.03 (0.62 to 1.51)	12282 (7562 to 17831)	24.91 (15.22 to 36.25)		1484 (1054 to 1973)	1.14 (0.81 to 1.52)	36040 (25667 to 47866)	27.51 (19.59 to 36.54)		0.35 (0.28 to 0.41)	0.33 (0.26 to 0.4)
Brunei Darussalam	0 (0 to 1)	0.52 (0.16 to 1.04)	9 (3 to 18)	14.69 (4.56 to 29.6)		1 (1 to 2)	0.77 (0.4 to 1.22)	40 (19 to 65)	20.88 (10.31 to 33.86)		1.87 (1.56 to 2.19)	1.74 (1.35 to 2.14)
Bulgaria	147 (101 to 197)	2.17 (1.48 to 2.9)	4223 (2927 to 5603)	64.51 (44.34 to 85.72)		195 (126 to 277)	2.53 (1.63 to 3.63)	5087 (3309 to 7252)	75.48 (48.49 to 108.85)		2.03 (1.34 to 2.71)	2.06 (1.37 to 2.75)
Burkina Faso	7 (2 to 15)	0.31 (0.09 to 0.65)	182 (55 to 381)	7.47 (2.22 to 15.73)		38 (20 to 63)	0.79 (0.42 to 1.32)	1031 (555 to 1703)	19.49 (10.47 to 31.89)		3.49 (3.44 to 3.54)	3.48 (3.42 to 3.54)
Burundi	5 (1 to 10)	0.35 (0.11 to 0.75)	133 (43 to 279)	9.63 (3.1 to 20.13)		9 (4 to 18)	0.41 (0.16 to 0.83)	267 (107 to 520)	10.78 (4.34 to 21.28)		0.26 (0.12 to 0.4)	0.07 (-0.1 to 0.23)
Cabo Verde	1 (0 to 2)	0.68 (0.31 to 1.14)	20 (9 to 34)	16.04 (7.55 to 26.85)		3 (2 to 5)	1.36 (0.8 to 2.01)	71 (44 to 104)	29.89 (18.43 to 44.01)		2.3 (2.17 to 2.43)	2.07 (1.96 to 2.17)
Cambodia	8 (2 to 18)	0.27 (0.06 to 0.66)	241 (60 to 583)	8.08 (1.96 to 19.58)		40 (18 to 70)	0.56 (0.25 to 0.97)	1200 (510 to 2136)	15.86 (6.83 to 28.03)		2.63 (2.49 to 2.78)	2.44 (2.3 to 2.57)
Cameroon	26 (14 to 40)	1.17 (0.63 to 1.84)	711 (391 to 1111)	28.94 (15.61 to 44.92)		76 (42 to 117)	1.32 (0.74 to 2.02)	2010 (1091 to 3171)	31.24 (17 to 48.56)		0.49 (0.43 to 0.55)	0.32 (0.28 to 0.36)
Canada	213 (138 to 298)	1.16 (0.76 to 1.63)	5121 (3331 to 7079)	29.48 (19.29 to 40.27)		504 (343 to 674)	1.34 (0.92 to 1.77)	11882 (8154 to 15560)	34.74 (24.27 to 45.11)		0.6 (0.4 to 0.79)	0.71 (0.55 to 0.87)
Central African Republic	2 (1 to 4)	0.29 (0.09 to 0.61)	58 (20 to 123)	7.95 (2.68 to 16.86)		5 (2 to 9)	0.38 (0.14 to 0.77)	141 (55 to 281)	10.29 (3.94 to 20.49)		1.26 (1.08 to 1.44)	1.21 (1.03 to 1.39)
Chad	3 (1 to 7)	0.23 (0.07 to 0.46)	86 (27 to 177)	5.75 (1.76 to 11.77)		13 (6 to 23)	0.55 (0.25 to 0.93)	369 (170 to 620)	13.66 (6.38 to 23.05)		3.16 (3.1 to 3.23)	3.12 (3.05 to 3.19)
Chile	38 (23 to 54)	0.71 (0.43 to 1.02)	900 (550 to 1282)	16.32 (9.98 to 23.23)		130 (84 to 176)	0.97 (0.63 to 1.31)	2989 (1979 to 4030)	22.85 (15.2 to 30.77)		1.11 (0.98 to 1.23)	1.28 (1.14 to 1.41)
China	1222 (316 to 2618)	0.27 (0.07 to 0.59)	38378 (9764 to 83099)	8.09 (2.07 to 17.48)		2967 (1306 to 5508)	0.28 (0.12 to 0.52)	90829 (40885 to 166472)	8.56 (3.81 to 15.63)		0.33 (-0.31 to 0.98)	0.45 (-0.2 to 1.1)
Colombia	55 (32 to 80)	0.62 (0.36 to 0.91)	1507 (904 to 2214)	15.72 (9.4 to 23.07)		196 (119 to 298)	0.68 (0.41 to 1.03)	5034 (3017 to 7517)	17.62 (10.59 to 26.39)		-0.13 (-0.38 to 0.12)	0.02 (-0.22 to 0.27)
Comoros	1 (0 to 1)	0.56 (0.21 to 1.08)	17 (6 to 33)	14.23 (5.11 to 27.61)		2 (1 to 4)	0.81 (0.41 to 1.35)	57 (29 to 95)	20.79 (10.49 to 34.52)		1.14 (1.02 to 1.26)	1.14 (0.98 to 1.3)
Congo	5 (2 to 8)	0.77 (0.36 to 1.32)	138 (65 to 235)	20.83 (9.85 to 35.25)		16 (9 to 25)	1.16 (0.68 to 1.81)	462 (272 to 737)	30.47 (17.77 to 48.39)		1.45 (1.3 to 1.6)	1.34 (1.18 to 1.51)
Cook Islands	0 (0 to 0)	1.05 (0.61 to 1.62)	2 (1 to 3)	29.94 (18.07 to 46.27)		0 (0 to 0)	0.99 (0.6 to 1.45)	3 (2 to 5)	27.38 (17.12 to 40.73)		-0.07 (-0.25 to 0.12)	-0.14 (-0.34 to 0.06)
Costa Rica	6 (3 to 9)	0.66 (0.39 to 0.98)	153 (94 to 224)	16.69 (10.23 to 24.59)		30 (18 to 46)	1.08 (0.64 to 1.65)	766 (460 to 1171)	27.3 (16.35 to 41.95)		1.32 (0.91 to 1.73)	1.4 (1.04 to 1.76)
Croatia	59 (38 to 82)	1.55 (0.98 to 2.15)	1474 (949 to 2021)	38.61 (24.8 to 52.94)		91 (59 to 128)	1.71 (1.11 to 2.43)	2008 (1304 to 2858)	43.01 (27.57 to 61.71)		0.95 (0.59 to 1.32)	1.32 (1.22 to 1.41)
Cuba	100 (65 to 137)	1.92 (1.25 to 2.64)	2806 (1874 to 3802)	53.88 (36.12 to 73.11)		302 (195 to 424)	3.04 (1.99 to 4.26)	7635 (5009 to 10681)	82.16 (53.69 to 114.46)		1.6 (1.36 to 1.84)	0.94 (0.58 to 1.29)
Cyprus	4 (2 to 7)	1.01 (0.52 to 1.68)	97 (50 to 158)	22.05 (11.27 to 35.82)		11 (6 to 16)	1.09 (0.55 to 1.61)	259 (135 to 390)	25.93 (13.4 to 38.98)		0.29 (0.18 to 0.41)	1.37 (1.08 to 1.66)
Czechia	203 (132 to 277)	2.46 (1.58 to 3.37)	4754 (3074 to 6439)	60.81 (39.54 to 82.62)		236 (156 to 322)	1.92 (1.28 to 2.64)	5134 (3425 to 7010)	47.07 (31.28 to 65.17)		-0.91 (-1 to -0.81)	0.64 (0.5 to 0.77)
C么te d'Ivoire	10 (5 to 17)	0.55 (0.27 to 0.94)	300 (153 to 506)	13.98 (7.01 to 23.43)		37 (20 to 59)	0.75 (0.39 to 1.21)	1050 (578 to 1666)	18.82 (10.13 to 30.05)		1.39 (1.28 to 1.5)	-0.96 (-1.04 to -0.87)
Democratic People's Republic of Korea	22 (4 to 55)	0.21 (0.04 to 0.54)	715 (134 to 1833)	6.63 (1.24 to 16.94)		38 (8 to 93)	0.21 (0.04 to 0.51)	1153 (225 to 2876)	6.47 (1.23 to 16.1)		-0.13 (-0.2 to -0.06)	-0.06 (-0.11 to -0.01)
Democratic Republic of the Congo	37 (17 to 67)	0.41 (0.18 to 0.76)	1091 (508 to 1953)	10.94 (5.14 to 19.83)		73 (31 to 137)	0.37 (0.16 to 0.7)	2133 (917 to 3975)	9.91 (4.29 to 18.65)		-0.91 (-1.43 to -0.39)	-0.94 (-1.46 to -0.42)
Denmark	58 (35 to 85)	1.25 (0.76 to 1.82)	1277 (781 to 1847)	30.71 (18.72 to 44.51)		72 (47 to 103)	1.1 (0.72 to 1.56)	1481 (967 to 2076)	25.78 (17.04 to 35.96)		-0.69 (-0.81 to -0.57)	-0.88 (-1 to -0.77)
Djibouti	0 (0 to 0)	0.25 (0.06 to 0.58)	5 (1 to 12)	6.5 (1.49 to 14.7)		2 (1 to 4)	0.78 (0.34 to 1.38)	62 (28 to 112)	19.81 (8.93 to 35.38)		4.49 (4.27 to 4.71)	4.47 (4.25 to 4.69)
Dominica	1 (0 to 1)	1.5 (0.91 to 2.29)	15 (9 to 22)	40.33 (24.92 to 60.49)		1 (1 to 2)	2.35 (1.48 to 3.38)	26 (16 to 37)	59.88 (37.53 to 85.5)		1.82 (1.57 to 2.07)	1.54 (1.3 to 1.77)
Dominican Republic	20 (9 to 33)	1.04 (0.48 to 1.71)	631 (301 to 1021)	29.45 (14.26 to 47.56)		107 (59 to 169)	2.21 (1.21 to 3.45)	3180 (1762 to 4979)	63.26 (35.19 to 99.22)		3.18 (2.81 to 3.55)	3.14 (2.81 to 3.48)
Ecuador	66 (37 to 92)	2.44 (1.34 to 3.44)	1943 (1127 to 2615)	66.38 (38.2 to 89.86)		162 (106 to 231)	2.09 (1.35 to 2.98)	4270 (2824 to 6051)	52.88 (34.89 to 74.69)		-0.06 (-0.49 to 0.37)	-0.36 (-0.79 to 0.07)
Egypt	93 (58 to 131)	0.63 (0.4 to 0.88)	2818 (1681 to 3964)	16.98 (10.44 to 23.78)		267 (157 to 400)	0.94 (0.56 to 1.39)	8035 (4550 to 11970)	24.11 (14.07 to 36.15)		1.44 (1.35 to 1.52)	1.25 (1.17 to 1.34)
El Salvador	15 (9 to 23)	0.96 (0.54 to 1.47)	422 (241 to 636)	25.86 (14.78 to 38.99)		36 (20 to 56)	1.04 (0.6 to 1.64)	893 (521 to 1403)	26.8 (15.62 to 42.14)		-0.21 (-0.48 to 0.06)	-0.33 (-0.57 to -0.09)
Equatorial Guinea	0 (0 to 1)	0.22 (0.06 to 0.52)	8 (2 to 17)	6.12 (1.53 to 13.87)		3 (1 to 5)	1.07 (0.57 to 1.77)	77 (39 to 133)	25.73 (13.25 to 43.65)		6.84 (6.11 to 7.56)	6.32 (5.58 to 7.06)
Eritrea	2 (1 to 3)	0.28 (0.09 to 0.61)	45 (15 to 100)	7.05 (2.38 to 15.53)		12 (5 to 21)	0.86 (0.36 to 1.45)	335 (143 to 565)	20.84 (8.88 to 35.08)		4.19 (3.76 to 4.62)	4.02 (3.62 to 4.42)
Estonia	21 (14 to 29)	1.6 (1.06 to 2.16)	521 (347 to 707)	40.98 (27.51 to 55.2)		29 (19 to 40)	1.68 (1.11 to 2.36)	628 (412 to 887)	43.86 (28.41 to 62.4)		0.05 (-0.12 to 0.21)	-0.01 (-0.19 to 0.18)
Eswatini	2 (1 to 3)	1.54 (0.99 to 2.26)	60 (37 to 88)	35.52 (22.11 to 52.37)		6 (4 to 10)	1.96 (1.11 to 3.1)	153 (85 to 253)	43.54 (24.22 to 70.8)		1.04 (0.45 to 1.64)	0.97 (0.34 to 1.59)
Ethiopia	21 (5 to 52)	0.21 (0.04 to 0.53)	664 (159 to 1643)	5.84 (1.36 to 14.47)		68 (31 to 130)	0.34 (0.15 to 0.66)	1925 (915 to 3695)	8.66 (4 to 16.55)		1.45 (1.06 to 1.83)	1.05 (0.68 to 1.42)
Fiji	4 (2 to 6)	1.92 (1.04 to 2.87)	121 (68 to 180)	54.89 (30.24 to 82.76)		10 (5 to 15)	2.44 (1.27 to 3.64)	295 (151 to 433)	67.68 (34.92 to 100.62)		0.98 (0.87 to 1.1)	0.91 (0.77 to 1.05)
Finland	51 (32 to 73)	1.14 (0.72 to 1.62)	1110 (699 to 1566)	27.07 (17.03 to 38.23)		95 (60 to 133)	1.29 (0.83 to 1.8)	1840 (1193 to 2581)	29.81 (19.7 to 41.13)		0.42 (0.26 to 0.59)	0.29 (0.1 to 0.49)
France	499 (303 to 719)	1 (0.61 to 1.42)	10428 (6392 to 14802)	23.55 (14.49 to 33.43)		886 (580 to 1216)	1.1 (0.73 to 1.5)	18021 (12103 to 24936)	27.16 (18.36 to 37.56)		0.59 (0.46 to 0.72)	0.78 (0.64 to 0.91)
Gabon	2 (1 to 4)	0.74 (0.36 to 1.31)	67 (34 to 115)	20.53 (10.41 to 34.84)		6 (4 to 10)	1.16 (0.67 to 1.85)	173 (100 to 285)	29.23 (17.01 to 47.59)		1.33 (0.92 to 1.74)	0.98 (0.55 to 1.41)
Gambia	1 (0 to 1)	0.32 (0.14 to 0.57)	14 (6 to 24)	7.97 (3.51 to 14.19)		3 (2 to 5)	0.67 (0.35 to 1.08)	86 (46 to 143)	17.09 (9.17 to 28.26)		2.44 (2.23 to 2.66)	2.48 (2.23 to 2.73)
Georgia	119 (81 to 160)	3.19 (2.19 to 4.31)	3353 (2297 to 4535)	91.52 (63.26 to 123.4)		93 (63 to 127)	2.74 (1.84 to 3.76)	2443 (1609 to 3400)	79.82 (52.96 to 111.5)		-0.09 (-0.46 to 0.27)	-0.16 (-0.55 to 0.23)
Germany	876 (566 to 1214)	1.08 (0.7 to 1.49)	18776 (12213 to 26144)	25.68 (16.68 to 35.88)		1142 (752 to 1550)	1.02 (0.69 to 1.39)	22917 (15530 to 31010)	24.62 (16.71 to 33.21)		-0.19 (-0.53 to 0.14)	-0.11 (-0.27 to 0.04)
Ghana	18 (6 to 34)	0.52 (0.18 to 0.99)	511 (191 to 955)	14.25 (5.2 to 26.91)		116 (53 to 175)	1.31 (0.62 to 1.96)	3156 (1424 to 4824)	33.29 (14.97 to 50.56)		2.92 (2.52 to 3.32)	2.64 (2.23 to 3.06)
Greece	78 (48 to 111)	0.94 (0.58 to 1.33)	1905 (1185 to 2681)	23.97 (14.95 to 33.9)		147 (93 to 203)	1.16 (0.75 to 1.59)	3229 (2098 to 4451)	30.84 (20.34 to 42.3)		0.84 (0.7 to 0.99)	1.1 (0.99 to 1.21)
Greenland	0 (0 to 0)	0.69 (0.41 to 1.05)	3 (2 to 5)	17.1 (10.22 to 25.83)		0 (0 to 0)	0.63 (0.38 to 0.94)	5 (3 to 8)	15.24 (9.15 to 22.69)		-0.87 (-1.25 to -0.49)	-0.88 (-1.2 to -0.56)
Grenada	1 (0 to 1)	2.21 (1.25 to 3.35)	22 (13 to 34)	63.48 (37.04 to 94.97)		3 (2 to 4)	5.16 (3.45 to 7.05)	82 (56 to 110)	140 (95.18 to 187.6)		3.06 (2.95 to 3.18)	2.9 (2.79 to 3.01)
Guam	1 (0 to 1)	1.51 (0.87 to 2.25)	17 (10 to 25)	40.24 (23.7 to 58.65)		2 (1 to 2)	1.56 (0.96 to 2.22)	44 (27 to 62)	45.47 (27.72 to 64.67)		0.22 (-0.26 to 0.71)	0.63 (0.18 to 1.08)
Guatemala	13 (6 to 23)	0.73 (0.31 to 1.27)	379 (165 to 652)	18.46 (8.05 to 31.72)		60 (35 to 94)	1.01 (0.58 to 1.58)	1616 (931 to 2511)	25.96 (15.03 to 40.21)		0.41 (-0.06 to 0.88)	0.51 (0.06 to 0.96)
Guinea	9 (4 to 16)	0.53 (0.24 to 0.94)	240 (112 to 420)	13.68 (6.36 to 24.12)		21 (11 to 34)	0.79 (0.41 to 1.26)	599 (321 to 955)	20.55 (10.86 to 32.51)		1.47 (1.44 to 1.49)	1.51 (1.47 to 1.54)
Guinea-Bissau	1 (0 to 2)	0.49 (0.18 to 0.96)	30 (10 to 58)	12.92 (4.63 to 25.05)		3 (2 to 5)	0.81 (0.39 to 1.39)	89 (44 to 150)	20.91 (10.21 to 35.56)		1.74 (1.67 to 1.81)	1.68 (1.59 to 1.77)
Guyana	4 (2 to 6)	1.82 (1.02 to 2.86)	109 (63 to 169)	50.03 (28.69 to 77.31)		10 (6 to 16)	3.07 (1.87 to 4.58)	313 (190 to 469)	85.82 (52.37 to 128.71)		1.75 (1.36 to 2.14)	1.78 (1.36 to 2.2)
Haiti	17 (6 to 34)	0.95 (0.33 to 1.92)	525 (182 to 996)	27.12 (9.25 to 53.19)		48 (21 to 90)	1.23 (0.53 to 2.3)	1497 (632 to 2800)	34.28 (14.81 to 64.74)		1.38 (1.19 to 1.57)	1.32 (1.12 to 1.51)
Honduras	8 (4 to 17)	0.77 (0.34 to 1.61)	248 (108 to 478)	21.11 (9.3 to 41.54)		55 (27 to 99)	1.74 (0.85 to 3.13)	1531 (756 to 2695)	44.45 (21.95 to 79.18)		2.92 (2.5 to 3.34)	2.68 (2.3 to 3.05)
Hungary	222 (155 to 291)	2.55 (1.79 to 3.33)	5213 (3680 to 6787)	62.88 (44.34 to 82)		203 (138 to 277)	1.72 (1.18 to 2.36)	4487 (3051 to 6130)	43.21 (29.2 to 59.26)		-1.85 (-2.24 to -1.46)	-1.8 (-2.21 to -1.4)
Iceland	2 (1 to 2)	1.04 (0.66 to 1.46)	38 (24 to 53)	26.52 (17.05 to 37.05)		2 (1 to 3)	0.72 (0.48 to 1.01)	50 (33 to 69)	18.67 (12.45 to 25.72)		-1.41 (-1.51 to -1.31)	-1.4 (-1.51 to -1.29)
India	290 (109 to 573)	0.14 (0.05 to 0.28)	8283 (3222 to 16063)	3.44 (1.31 to 6.77)		1875 (1029 to 2837)	0.32 (0.18 to 0.49)	49734 (27348 to 74271)	8.15 (4.49 to 12.19)		2.85 (2.63 to 3.06)	2.92 (2.74 to 3.11)
Indonesia	155 (45 to 323)	0.28 (0.08 to 0.58)	5132 (1536 to 10535)	8.31 (2.47 to 17.17)		1027 (502 to 1626)	0.84 (0.4 to 1.34)	32883 (15835 to 51683)	24.95 (12.28 to 39.2)		4.39 (4.17 to 4.6)	4.4 (4.1 to 4.7)
Iran (Islamic Republic of)	38 (22 to 57)	0.31 (0.17 to 0.46)	1168 (639 to 1756)	8.18 (4.55 to 12.32)		170 (82 to 234)	0.48 (0.24 to 0.65)	4819 (2147 to 6714)	12.19 (5.66 to 16.88)		1.43 (0.91 to 1.96)	1.28 (0.72 to 1.84)
Iraq	28 (15 to 58)	0.71 (0.38 to 1.48)	824 (452 to 1596)	19.37 (10.51 to 38.46)		118 (71 to 177)	0.98 (0.61 to 1.46)	3716 (2223 to 5694)	27.38 (16.41 to 41.31)		1.52 (1.14 to 1.9)	1.62 (1.26 to 1.99)
Ireland	23 (14 to 32)	1.01 (0.64 to 1.42)	526 (334 to 739)	24.77 (15.81 to 34.9)		47 (30 to 65)	1.16 (0.75 to 1.61)	1095 (708 to 1512)	29.18 (18.83 to 40.16)		1.23 (0.93 to 1.54)	1.35 (1.05 to 1.66)
Israel	24 (15 to 33)	0.89 (0.56 to 1.24)	543 (341 to 754)	20.73 (13.04 to 28.72)		79 (50 to 111)	1.21 (0.78 to 1.7)	1710 (1107 to 2400)	28.25 (18.36 to 39.22)		1.12 (0.85 to 1.38)	1.12 (0.86 to 1.38)
Italy	234 (147 to 327)	0.45 (0.28 to 0.63)	5555 (3468 to 7839)	11.46 (7.13 to 16.11)		723 (475 to 1012)	0.89 (0.59 to 1.23)	16496 (10771 to 22984)	24.83 (16.1 to 34.65)		3.12 (2.65 to 3.6)	3.48 (2.97 to 3.99)
Jamaica	11 (7 to 16)	1.19 (0.75 to 1.68)	266 (172 to 374)	29.47 (19.19 to 41.1)		56 (37 to 78)	3.62 (2.37 to 5.07)	1329 (881 to 1855)	88.48 (58.47 to 123.1)		4.2 (3.76 to 4.64)	4.1 (3.65 to 4.55)
Japan	305 (116 to 540)	0.32 (0.12 to 0.56)	7498 (2891 to 13172)	8.02 (3.09 to 14.12)		555 (223 to 969)	0.33 (0.14 to 0.56)	12433 (5142 to 21413)	9.72 (3.91 to 16.68)		0.29 (0.19 to 0.39)	0.95 (0.84 to 1.07)
Jordan	9 (5 to 13)	1.38 (0.86 to 2.12)	242 (154 to 370)	33.91 (21.46 to 51.75)		35 (23 to 48)	1.23 (0.8 to 1.71)	983 (640 to 1376)	29.37 (19.22 to 40.86)		-0.65 (-0.92 to -0.39)	-0.76 (-1.01 to -0.5)
Kazakhstan	202 (137 to 269)	2.59 (1.76 to 3.45)	5521 (3756 to 7408)	69.93 (47.51 to 93.33)		188 (130 to 248)	1.83 (1.26 to 2.42)	5277 (3631 to 6964)	49.64 (34.1 to 65.71)		-1.4 (-1.75 to -1.05)	-1.44 (-1.77 to -1.12)
Kenya	10 (4 to 17)	0.22 (0.1 to 0.41)	281 (137 to 508)	5.99 (2.91 to 10.87)		54 (30 to 89)	0.47 (0.26 to 0.78)	1562 (882 to 2583)	12.05 (6.74 to 19.7)		3.07 (2.85 to 3.3)	2.88 (2.7 to 3.05)
Kiribati	0 (0 to 1)	1.9 (0.8 to 3.06)	14 (6 to 22)	59.18 (24.59 to 94.03)		1 (0 to 1)	1.88 (0.72 to 3.08)	26 (10 to 42)	56.11 (22.12 to 89.78)		-0.21 (-0.36 to -0.07)	-0.35 (-0.48 to -0.22)
Kuwait	2 (2 to 3)	1.11 (0.78 to 1.47)	69 (49 to 90)	27.21 (19.4 to 35.99)		13 (9 to 17)	1.38 (0.96 to 1.89)	374 (263 to 504)	31.65 (22.27 to 42.92)		2.33 (1.61 to 3.06)	1.95 (1.21 to 2.71)
Kyrgyzstan	21 (13 to 30)	1.18 (0.74 to 1.66)	594 (370 to 837)	33.18 (20.78 to 46.59)		33 (21 to 46)	1.24 (0.81 to 1.73)	979 (639 to 1388)	34.61 (22.84 to 48.8)		0.01 (-0.19 to 0.21)	-0.06 (-0.26 to 0.15)
Lao People's Democratic Republic	5 (1 to 10)	0.38 (0.1 to 0.89)	143 (36 to 341)	11.46 (2.93 to 27.15)		19 (8 to 32)	0.77 (0.35 to 1.3)	606 (259 to 1038)	22.72 (9.92 to 38.3)		2.54 (2.48 to 2.6)	2.52 (2.44 to 2.6)
Latvia	42 (28 to 56)	1.8 (1.19 to 2.42)	1050 (705 to 1411)	47.41 (32.09 to 63.11)		62 (40 to 88)	2.42 (1.56 to 3.47)	1378 (879 to 1960)	63.14 (40.64 to 90.07)		1.25 (0.93 to 1.58)	1.13 (0.8 to 1.47)
Lebanon	15 (9 to 22)	1.35 (0.83 to 1.98)	394 (239 to 590)	32.71 (20.05 to 48.62)		39 (24 to 56)	1.36 (0.83 to 1.97)	957 (585 to 1392)	33.77 (20.57 to 49.14)		0.06 (0 to 0.13)	0.14 (0.03 to 0.25)
Lesotho	4 (2 to 6)	0.66 (0.36 to 1.1)	91 (51 to 148)	16.08 (8.94 to 26.18)		14 (8 to 23)	1.96 (1.07 to 3.13)	366 (198 to 583)	47.01 (25.24 to 76.07)		4.9 (4.4 to 5.4)	4.97 (4.43 to 5.51)
Liberia	4 (2 to 6)	0.78 (0.41 to 1.24)	111 (61 to 174)	20.54 (11.23 to 32.46)		9 (5 to 14)	0.96 (0.54 to 1.52)	265 (152 to 416)	24.86 (14.09 to 38.7)		1.67 (1.03 to 2.31)	1.59 (0.97 to 2.2)
Libya	8 (4 to 11)	0.91 (0.52 to 1.35)	211 (124 to 313)	23.13 (13.56 to 34.23)		26 (15 to 37)	1.07 (0.63 to 1.52)	736 (443 to 1068)	27.27 (16.17 to 39.06)		0.79 (0.58 to 0.99)	0.76 (0.54 to 0.98)
Lithuania	54 (35 to 73)	1.94 (1.28 to 2.64)	1357 (883 to 1824)	50.37 (32.94 to 67.97)		79 (53 to 108)	2.15 (1.44 to 2.99)	1644 (1097 to 2282)	52.37 (34.55 to 73.2)		-0.1 (-0.33 to 0.13)	-0.38 (-0.63 to -0.13)
Luxembourg	6 (4 to 8)	1.85 (1.21 to 2.58)	137 (89 to 192)	45.08 (29.36 to 62.9)		7 (5 to 10)	1.27 (0.84 to 1.79)	155 (102 to 220)	31.32 (20.6 to 44.39)		-1.18 (-1.31 to -1.05)	-1.15 (-1.27 to -1.02)
Madagascar	9 (4 to 16)	0.35 (0.14 to 0.64)	259 (103 to 477)	9.19 (3.69 to 16.96)		34 (15 to 59)	0.61 (0.27 to 1.06)	1001 (433 to 1738)	15.75 (7.05 to 27.08)		2.27 (2.01 to 2.54)	2.23 (1.94 to 2.53)
Malawi	4 (1 to 9)	0.19 (0.05 to 0.42)	120 (33 to 254)	5.17 (1.39 to 11.06)		15 (8 to 26)	0.39 (0.19 to 0.67)	422 (209 to 704)	9.87 (4.86 to 16.59)		3.05 (2.86 to 3.24)	2.73 (2.57 to 2.89)
Malaysia	29 (14 to 48)	0.59 (0.29 to 1)	851 (442 to 1393)	16.41 (8.45 to 27.07)		131 (76 to 197)	0.98 (0.56 to 1.47)	3685 (2132 to 5572)	25.67 (14.96 to 38.65)		1.73 (1.62 to 1.84)	1.64 (1.52 to 1.75)
Maldives	0 (0 to 0)	0.23 (0.05 to 0.55)	3 (1 to 8)	6.96 (1.53 to 16.22)		0 (0 to 1)	0.3 (0.15 to 0.48)	13 (7 to 21)	8.54 (4.62 to 13.55)		0.52 (0.24 to 0.8)	0.45 (0.18 to 0.73)
Mali	6 (2 to 11)	0.28 (0.1 to 0.54)	161 (55 to 307)	7.17 (2.5 to 13.71)		22 (11 to 35)	0.52 (0.27 to 0.83)	607 (321 to 999)	13.44 (6.98 to 21.84)		2.15 (2.02 to 2.27)	2.21 (2.09 to 2.33)
Malta	3 (2 to 4)	1.13 (0.66 to 1.7)	65 (39 to 96)	27.36 (16.27 to 40.54)		5 (3 to 8)	1.05 (0.65 to 1.54)	118 (73 to 173)	26.17 (16.38 to 38.58)		-0.43 (-0.72 to -0.14)	-0.3 (-0.59 to 0)
Marshall Islands	0 (0 to 0)	1.37 (0.54 to 2.52)	4 (2 to 7)	40.39 (16.77 to 72.12)		0 (0 to 1)	2.35 (1 to 4.14)	16 (7 to 26)	71.06 (30.8 to 122.77)		1.51 (1.13 to 1.89)	1.55 (1.14 to 1.96)
Mauritania	6 (3 to 9)	1.12 (0.61 to 1.74)	153 (85 to 236)	28.62 (15.73 to 44.29)		12 (7 to 18)	1.25 (0.75 to 1.82)	305 (181 to 454)	28.68 (17.17 to 42.44)		0.45 (0.38 to 0.53)	0.1 (0.02 to 0.17)
Mauritius	6 (3 to 8)	1.38 (0.8 to 2.02)	153 (90 to 219)	36.62 (21.58 to 52.37)		13 (8 to 19)	1.37 (0.84 to 2.02)	339 (208 to 500)	35.28 (21.56 to 52.21)		-0.66 (-0.88 to -0.43)	-0.86 (-1.11 to -0.61)
Mexico	146 (94 to 203)	0.68 (0.43 to 0.95)	3984 (2577 to 5439)	16.81 (10.82 to 23.12)		468 (302 to 651)	0.74 (0.48 to 1.04)	13266 (8819 to 18343)	20.35 (13.53 to 28.13)		0.67 (0.28 to 1.06)	1.05 (0.65 to 1.45)
Micronesia (Federated States of)	1 (0 to 1)	2.46 (1.29 to 4.09)	20 (11 to 33)	75.8 (40.66 to 125.09)		1 (1 to 2)	3.15 (1.48 to 5.33)	42 (19 to 74)	95.33 (43.7 to 163.31)		0.7 (0.54 to 0.86)	0.67 (0.51 to 0.83)
Monaco	0 (0 to 0)	0.54 (0.31 to 0.85)	5 (3 to 7)	13.47 (7.72 to 21.35)		0 (0 to 0)	0.61 (0.35 to 0.9)	7 (4 to 10)	15.32 (8.84 to 22.8)		0.66 (0.52 to 0.79)	0.69 (0.56 to 0.82)
Mongolia	5 (3 to 8)	0.82 (0.45 to 1.33)	162 (85 to 264)	24.92 (13.39 to 40.23)		12 (7 to 20)	0.87 (0.49 to 1.39)	429 (240 to 687)	26.55 (14.91 to 42.1)		-0.31 (-0.66 to 0.04)	-0.31 (-0.64 to 0.03)
Montenegro	5 (3 to 7)	1.41 (0.93 to 2.13)	132 (87 to 199)	37.64 (24.91 to 56.8)		9 (6 to 12)	1.58 (1.04 to 2.27)	218 (146 to 313)	42.47 (28.54 to 60.85)		0.58 (0.42 to 0.74)	0.54 (0.36 to 0.73)
Morocco	36 (21 to 56)	0.52 (0.29 to 0.82)	1022 (586 to 1591)	13.63 (7.87 to 21.03)		132 (76 to 195)	0.84 (0.49 to 1.25)	3687 (2107 to 5546)	21.61 (12.42 to 31.98)		1.88 (1.79 to 1.97)	1.75 (1.67 to 1.83)
Mozambique	7 (2 to 18)	0.23 (0.05 to 0.58)	215 (55 to 513)	6.01 (1.49 to 14.54)		40 (18 to 73)	0.66 (0.29 to 1.21)	1177 (536 to 2116)	17.32 (7.91 to 31.13)		4.48 (4.18 to 4.78)	4.51 (4.2 to 4.82)
Myanmar	36 (8 to 91)	0.27 (0.06 to 0.69)	1161 (258 to 2981)	8.29 (1.83 to 21.01)		185 (89 to 302)	0.67 (0.32 to 1.09)	5773 (2737 to 9457)	19.89 (9.38 to 32.28)		3.68 (3.45 to 3.91)	3.54 (3.28 to 3.8)
Namibia	3 (2 to 5)	0.74 (0.42 to 1.19)	76 (44 to 118)	18.85 (10.97 to 29.24)		8 (5 to 13)	1.07 (0.65 to 1.65)	208 (127 to 324)	25.3 (15.33 to 39.3)		1.17 (0.96 to 1.38)	0.88 (0.65 to 1.11)
Nauru	0 (0 to 0)	2.9 (1.39 to 4.59)	2 (1 to 3)	83.84 (40.01 to 132.49)		0 (0 to 0)	3.02 (1.27 to 4.78)	3 (1 to 4)	89.56 (37.39 to 141.36)		-0.14 (-0.26 to -0.02)	-0.03 (-0.15 to 0.09)
Nepal	4 (1 to 11)	0.09 (0.02 to 0.24)	125 (29 to 316)	2.44 (0.55 to 6.19)		33 (14 to 80)	0.29 (0.12 to 0.69)	903 (365 to 2131)	7.24 (2.95 to 17.09)		4.36 (4.1 to 4.63)	4.26 (3.91 to 4.61)
Netherlands	120 (72 to 173)	1 (0.61 to 1.45)	2551 (1565 to 3643)	23.41 (14.46 to 33.43)		234 (149 to 335)	1.21 (0.78 to 1.73)	5003 (3174 to 7091)	29.53 (19.04 to 41.97)		0.63 (0.49 to 0.76)	0.8 (0.67 to 0.94)
New Zealand	25 (16 to 35)	1.15 (0.73 to 1.6)	591 (378 to 826)	28.96 (18.57 to 40.32)		58 (39 to 79)	1.39 (0.93 to 1.87)	1352 (912 to 1837)	35.32 (23.9 to 47.51)		0.85 (0.76 to 0.95)	0.89 (0.8 to 0.99)
Nicaragua	3 (2 to 5)	0.35 (0.19 to 0.56)	85 (47 to 132)	9.62 (5.36 to 15.04)		17 (10 to 25)	0.72 (0.44 to 1.08)	454 (263 to 677)	17.85 (10.49 to 26.49)		2.38 (2.05 to 2.71)	2.09 (1.85 to 2.32)
Niger	5 (2 to 9)	0.36 (0.14 to 0.68)	132 (51 to 243)	9.12 (3.46 to 16.89)		20 (10 to 35)	0.52 (0.25 to 0.91)	551 (273 to 957)	12.72 (6.28 to 22.01)		1.24 (1.17 to 1.3)	1.1 (1.01 to 1.18)
Nigeria	27 (10 to 69)	0.13 (0.05 to 0.34)	675 (244 to 1722)	3.17 (1.14 to 8.14)		109 (52 to 256)	0.25 (0.12 to 0.6)	3035 (1486 to 6849)	6.03 (2.91 to 14.01)		2.39 (2.3 to 2.48)	2.35 (2.26 to 2.44)
Niue	0 (0 to 0)	1.92 (1 to 3.01)	1 (0 to 1)	54.79 (28.94 to 85.2)		0 (0 to 0)	2.26 (1.05 to 3.52)	1 (0 to 1)	65.35 (30.31 to 101.6)		0.41 (0.29 to 0.52)	0.44 (0.32 to 0.57)
North Macedonia	18 (11 to 30)	1.84 (1.14 to 3.18)	499 (312 to 785)	48.36 (30.06 to 76.99)		43 (27 to 63)	2.59 (1.63 to 3.71)	1143 (718 to 1648)	68.67 (42.49 to 99.46)		1.46 (1.21 to 1.71)	1.45 (1.2 to 1.71)
Northern Mariana Islands	0 (0 to 0)	2.99 (1.73 to 5.96)	8 (5 to 16)	84.39 (48.92 to 165.63)		1 (1 to 2)	3.96 (2.34 to 5.64)	34 (20 to 50)	112.54 (66.92 to 161.27)		1.67 (1.3 to 2.04)	1.68 (1.31 to 2.04)
Norway	38 (22 to 55)	0.96 (0.57 to 1.39)	801 (475 to 1149)	23.64 (14.15 to 33.45)		54 (34 to 76)	1 (0.64 to 1.4)	1133 (715 to 1577)	24.24 (15.56 to 33.75)		0.27 (0.11 to 0.43)	0.21 (0.01 to 0.41)
Oman	1 (0 to 1)	0.29 (0.14 to 0.47)	24 (13 to 39)	7.42 (3.95 to 12.1)		3 (2 to 5)	0.53 (0.33 to 0.73)	101 (65 to 139)	12.84 (8.14 to 17.73)		2.57 (2.12 to 3.02)	2.33 (1.77 to 2.88)
Pakistan	122 (35 to 255)	0.49 (0.14 to 1.02)	3294 (950 to 6929)	12.21 (3.51 to 25.26)		746 (391 to 1208)	1.43 (0.76 to 2.29)	21408 (10991 to 34814)	36.2 (18.94 to 58.41)		4.04 (3.61 to 4.47)	4.08 (3.66 to 4.51)
Palau	0 (0 to 0)	0.25 (0.14 to 0.39)	0 (0 to 1)	7.24 (4.3 to 11.17)		0 (0 to 0)	0.25 (0.15 to 0.38)	1 (1 to 1)	7.35 (4.47 to 11.15)		-0.03 (-0.09 to 0.02)	-0.05 (-0.11 to 0.01)
Palestine	7 (4 to 11)	1.35 (0.72 to 2.21)	193 (104 to 317)	37.69 (20.21 to 61.24)		22 (12 to 32)	1.88 (1.02 to 2.69)	645 (354 to 928)	48.45 (26.31 to 69.03)		1.08 (0.71 to 1.46)	0.82 (0.47 to 1.17)
Panama	3 (1 to 5)	0.42 (0.17 to 0.73)	81 (35 to 140)	10.79 (4.64 to 18.45)		25 (15 to 38)	1.19 (0.73 to 1.8)	636 (395 to 955)	30.23 (18.77 to 45.41)		4 (3.75 to 4.25)	3.98 (3.72 to 4.24)
Papua New Guinea	6 (2 to 11)	0.62 (0.23 to 1.17)	199 (81 to 363)	18.25 (7.4 to 33.57)		23 (9 to 41)	0.88 (0.34 to 1.67)	773 (311 to 1420)	26.53 (10.53 to 48.41)		1.03 (0.78 to 1.27)	1.11 (0.84 to 1.37)
Paraguay	16 (9 to 25)	1.42 (0.78 to 2.15)	438 (241 to 653)	36.82 (20.37 to 54.75)		39 (22 to 65)	1.36 (0.78 to 2.26)	1011 (579 to 1664)	34.35 (19.61 to 56.69)		-0.74 (-1.02 to -0.45)	-0.89 (-1.18 to -0.6)
Peru	73 (38 to 115)	1.19 (0.63 to 1.89)	2057 (1107 to 3241)	31.63 (16.93 to 49.74)		212 (121 to 331)	1.28 (0.73 to 1.99)	5491 (3150 to 8540)	32.77 (18.75 to 50.96)		0.11 (-0.1 to 0.31)	-0.02 (-0.23 to 0.19)
Philippines	76 (34 to 133)	0.47 (0.2 to 0.82)	2483 (1076 to 4261)	13.64 (6.02 to 23.4)		327 (175 to 524)	0.75 (0.4 to 1.2)	10311 (5581 to 16129)	22.09 (12 to 34.61)		1.39 (1.22 to 1.57)	1.47 (1.31 to 1.63)
Poland	491 (336 to 653)	1.9 (1.3 to 2.52)	12114 (8354 to 16114)	48.29 (33.49 to 64.21)		934 (621 to 1298)	2.21 (1.47 to 3.06)	20463 (13820 to 28135)	53.31 (35.98 to 73.74)		0.6 (0.51 to 0.68)	0.4 (0.32 to 0.48)
Portugal	94 (54 to 138)	1.18 (0.68 to 1.74)	2294 (1332 to 3362)	30.3 (17.79 to 44.46)		150 (95 to 214)	1.08 (0.69 to 1.53)	3208 (2050 to 4582)	27.41 (17.49 to 38.84)		-0.48 (-0.56 to -0.41)	-0.53 (-0.6 to -0.45)
Puerto Rico	24 (16 to 33)	1.25 (0.82 to 1.7)	634 (421 to 841)	32.78 (21.76 to 43.42)		57 (38 to 80)	1.5 (0.99 to 2.13)	1369 (905 to 1941)	42.05 (27.73 to 59.92)		0.75 (0.64 to 0.85)	0.97 (0.86 to 1.08)
Qatar	0 (0 to 0)	1.03 (0.48 to 1.6)	9 (5 to 14)	24.53 (12.15 to 36.81)		2 (1 to 3)	1.6 (0.6 to 2.33)	69 (31 to 101)	32.88 (12.53 to 47.97)		2.56 (2.02 to 3.11)	1.88 (1.37 to 2.4)
Republic of Korea	91 (30 to 169)	0.51 (0.17 to 0.94)	2787 (819 to 5233)	14.61 (4.38 to 27.21)		92 (43 to 151)	0.19 (0.09 to 0.31)	2437 (1118 to 4015)	5.25 (2.37 to 8.76)		-3.44 (-4.29 to -2.58)	-3.38 (-4.35 to -2.4)
Republic of Moldova	41 (26 to 56)	1.51 (0.97 to 2.1)	1173 (757 to 1614)	43.47 (28.16 to 60.44)		55 (38 to 73)	1.59 (1.08 to 2.12)	1498 (1022 to 1999)	45.52 (30.96 to 60.56)		0.43 (0.11 to 0.75)	0.39 (0.08 to 0.7)
Romania	244 (173 to 320)	1.56 (1.11 to 2.05)	6711 (4794 to 8825)	43.67 (31.01 to 57.24)		316 (222 to 423)	1.54 (1.08 to 2.08)	7911 (5504 to 10840)	43.5 (30.29 to 59.58)		-0.17 (-0.36 to 0.03)	-0.17 (-0.35 to 0.01)
Russian Federation	2578 (1749 to 3404)	2.19 (1.49 to 2.89)	70808 (47848 to 93152)	62.8 (42.46 to 82.69)		3291 (2275 to 4508)	2.23 (1.54 to 3.06)	87256 (60931 to 117363)	63.7 (44.47 to 85.74)		-0.39 (-0.64 to -0.14)	-0.44 (-0.71 to -0.16)
Rwanda	8 (2 to 16)	0.47 (0.14 to 0.98)	230 (66 to 463)	12.87 (3.7 to 25.9)		24 (11 to 39)	0.69 (0.32 to 1.15)	653 (309 to 1083)	17.32 (8.29 to 28.76)		1.29 (0.82 to 1.76)	0.85 (0.35 to 1.36)
Saint Kitts and Nevis	1 (0 to 1)	2.97 (1.89 to 4.21)	16 (10 to 22)	82.01 (52.86 to 115.25)		1 (1 to 2)	3.18 (2.05 to 4.54)	29 (19 to 42)	80.52 (51.57 to 113.92)		0.58 (0.33 to 0.83)	0.08 (-0.12 to 0.27)
Saint Lucia	1 (0 to 1)	1.61 (0.95 to 2.4)	22 (13 to 32)	44.92 (27.16 to 66.26)		2 (2 to 3)	2.18 (1.45 to 3.05)	68 (46 to 93)	60.19 (40.69 to 82.75)		0.41 (0.16 to 0.66)	0.49 (0.29 to 0.69)
Saint Vincent and the Grenadines	1 (0 to 1)	1.89 (1.04 to 2.94)	20 (11 to 30)	51.5 (29.01 to 78.26)		2 (2 to 3)	3.7 (2.41 to 5.08)	66 (44 to 89)	99.42 (66.05 to 135.35)		2.22 (2.09 to 2.36)	2.04 (1.88 to 2.2)
Samoa	1 (1 to 1)	2.03 (1.14 to 3.04)	26 (16 to 38)	55.51 (33.16 to 82.15)		2 (1 to 2)	2.09 (1.19 to 3.25)	45 (27 to 68)	57.23 (33.94 to 87.35)		-0.1 (-0.16 to -0.03)	-0.09 (-0.16 to -0.02)
San Marino	0 (0 to 0)	0.35 (0.2 to 0.52)	1 (1 to 2)	8.01 (4.67 to 11.95)		0 (0 to 0)	0.37 (0.19 to 0.66)	3 (1 to 5)	9.21 (4.82 to 16.33)		0.86 (0.61 to 1.11)	1.06 (0.82 to 1.3)
Sao Tome and Principe	0 (0 to 1)	1.04 (0.5 to 1.7)	9 (4 to 14)	25 (12.32 to 40.36)		1 (1 to 2)	1.98 (1.09 to 3.15)	26 (15 to 41)	46.23 (26.46 to 72.04)		2.15 (2.02 to 2.28)	2.01 (1.84 to 2.19)
Saudi Arabia	13 (7 to 21)	0.53 (0.3 to 0.87)	358 (196 to 593)	13.36 (7.46 to 21.93)		67 (42 to 92)	0.99 (0.58 to 1.4)	2248 (1413 to 3197)	25.22 (15.67 to 35.8)		2.24 (1.94 to 2.53)	2.34 (2.04 to 2.64)
Senegal	9 (4 to 15)	0.56 (0.28 to 0.96)	243 (124 to 402)	14.23 (7.17 to 23.72)		33 (18 to 52)	0.87 (0.49 to 1.37)	852 (483 to 1348)	21.01 (11.78 to 33.38)		1.78 (1.55 to 2)	1.53 (1.31 to 1.76)
Serbia	107 (66 to 160)	1.76 (1.09 to 2.67)	2818 (1742 to 4179)	44.54 (27.56 to 66)		193 (117 to 280)	2.19 (1.32 to 3.15)	4623 (2729 to 6745)	56.89 (33.26 to 83.51)		0.86 (0.68 to 1.03)	0.91 (0.72 to 1.1)
Seychelles	0 (0 to 0)	1.01 (0.59 to 1.52)	9 (5 to 13)	30.97 (18.67 to 45.6)		1 (0 to 1)	1.15 (0.69 to 1.7)	20 (12 to 30)	33.72 (20.56 to 49.47)		0.51 (0.38 to 0.65)	0.39 (0.26 to 0.52)
Sierra Leone	3 (1 to 6)	0.32 (0.11 to 0.63)	75 (26 to 146)	7.94 (2.75 to 15.41)		12 (6 to 19)	0.67 (0.33 to 1.12)	318 (159 to 521)	17.22 (8.6 to 28.29)		2.9 (2.71 to 3.09)	3.04 (2.85 to 3.23)
Singapore	3 (1 to 5)	0.24 (0.08 to 0.44)	75 (26 to 141)	6 (2.09 to 11.26)		24 (14 to 35)	0.59 (0.34 to 0.86)	663 (393 to 975)	16.25 (9.61 to 23.79)		4.03 (3.68 to 4.38)	4.26 (3.91 to 4.61)
Slovakia	96 (64 to 127)	2.74 (1.83 to 3.66)	2332 (1557 to 3129)	69 (45.73 to 92.54)		131 (81 to 188)	2.4 (1.5 to 3.44)	3017 (1899 to 4429)	59.49 (37.52 to 86.72)		-0.64 (-0.75 to -0.53)	-0.72 (-0.82 to -0.61)
Slovenia	28 (18 to 40)	1.85 (1.17 to 2.65)	643 (402 to 933)	44.45 (27.87 to 65.25)		40 (25 to 58)	1.53 (0.97 to 2.23)	795 (501 to 1153)	36.2 (22.59 to 52.25)		-0.85 (-1.01 to -0.68)	-0.91 (-1.09 to -0.72)
Solomon Islands	1 (0 to 2)	1.57 (0.61 to 2.94)	43 (17 to 82)	51.59 (21.04 to 98.4)		5 (2 to 8)	2.51 (1.05 to 4.36)	173 (71 to 305)	82.78 (34.5 to 144.81)		1.4 (1.06 to 1.75)	1.43 (1.09 to 1.78)
Somalia	3 (1 to 8)	0.23 (0.05 to 0.6)	106 (26 to 262)	6.42 (1.47 to 16.16)		10 (2 to 25)	0.25 (0.06 to 0.67)	301 (75 to 766)	6.84 (1.63 to 17.76)		0.76 (0.6 to 0.92)	0.71 (0.55 to 0.88)
South Africa	109 (74 to 148)	0.93 (0.63 to 1.27)	2795 (1903 to 3687)	22.56 (15.42 to 30.12)		335 (217 to 436)	1.34 (0.86 to 1.75)	7756 (5328 to 10164)	29.74 (20.18 to 39.03)		1.67 (1.34 to 2.01)	1.4 (1.08 to 1.73)
South Sudan	6 (3 to 12)	0.61 (0.24 to 1.15)	173 (72 to 319)	15.68 (6.45 to 29.07)		14 (7 to 24)	0.83 (0.4 to 1.42)	410 (195 to 692)	20.25 (9.89 to 33.9)		1.3 (1.17 to 1.42)	1.12 (0.99 to 1.25)
Spain	367 (238 to 504)	1.16 (0.75 to 1.59)	8569 (5562 to 11698)	29.14 (18.99 to 39.71)		736 (494 to 1012)	1.31 (0.89 to 1.78)	15214 (10308 to 21082)	32.6 (22.16 to 44.7)		0.4 (0.3 to 0.5)	0.43 (0.32 to 0.54)
Sri Lanka	15 (7 to 26)	0.29 (0.13 to 0.51)	430 (202 to 751)	7.33 (3.47 to 12.76)		82 (43 to 135)	0.58 (0.3 to 0.97)	2053 (1086 to 3345)	14.18 (7.43 to 23.24)		3.29 (2.96 to 3.63)	3 (2.69 to 3.32)
Sudan	11 (5 to 22)	0.24 (0.11 to 0.48)	334 (151 to 636)	6.82 (3.11 to 13.14)		39 (22 to 66)	0.45 (0.25 to 0.78)	1195 (651 to 2033)	11.89 (6.63 to 20.12)		2.39 (2.19 to 2.59)	2.21 (2.03 to 2.39)
Suriname	1 (1 to 2)	0.76 (0.44 to 1.21)	29 (17 to 46)	20.61 (11.83 to 32.18)		4 (2 to 6)	1.23 (0.75 to 1.76)	110 (67 to 160)	33.54 (20.41 to 48.52)		1.6 (1.35 to 1.85)	1.54 (1.3 to 1.78)
Sweden	89 (53 to 129)	1.01 (0.61 to 1.46)	1854 (1128 to 2662)	24.23 (14.87 to 34.77)		131 (85 to 182)	1.07 (0.7 to 1.47)	2533 (1655 to 3519)	24.71 (16.14 to 34.19)		0.15 (0.08 to 0.22)	0 (-0.09 to 0.09)
Switzerland	55 (35 to 79)	0.87 (0.55 to 1.23)	1140 (715 to 1615)	20.31 (12.65 to 28.77)		74 (47 to 104)	0.72 (0.47 to 1.01)	1479 (948 to 2075)	17.11 (11.1 to 23.9)		-0.51 (-0.68 to -0.34)	-0.54 (-0.71 to -0.38)
Syrian Arab Republic	14 (8 to 23)	0.53 (0.29 to 0.91)	435 (250 to 666)	14.66 (8.31 to 23.6)		33 (19 to 58)	0.57 (0.33 to 1.05)	984 (568 to 1641)	14.6 (8.52 to 24.79)		-0.18 (-0.56 to 0.19)	-0.4 (-0.78 to -0.03)
Taiwan (Province of China)	16 (8 to 25)	0.22 (0.11 to 0.35)	424 (204 to 670)	5.45 (2.63 to 8.61)		104 (55 to 164)	0.49 (0.26 to 0.78)	3257 (1730 to 5138)	16.06 (8.57 to 25.42)		4.37 (3.9 to 4.85)	5.5 (5.01 to 6)
Tajikistan	10 (5 to 17)	0.64 (0.31 to 1.06)	304 (147 to 508)	19.19 (9.35 to 31.93)		35 (18 to 56)	1.2 (0.64 to 1.88)	1162 (595 to 1882)	34.9 (17.95 to 55.65)		2.35 (1.9 to 2.8)	2.16 (1.68 to 2.64)
Thailand	47 (17 to 88)	0.23 (0.08 to 0.44)	1500 (573 to 2735)	6.88 (2.54 to 12.66)		221 (118 to 354)	0.39 (0.21 to 0.63)	6478 (3419 to 10358)	11.53 (6.14 to 18.5)		1.34 (0.98 to 1.7)	1.26 (0.86 to 1.66)
Timor-Leste	0 (0 to 1)	0.23 (0.05 to 0.57)	12 (3 to 30)	6.56 (1.53 to 16.4)		1 (0 to 3)	0.32 (0.1 to 0.66)	41 (13 to 83)	9.28 (2.89 to 18.72)		1.56 (0.97 to 2.15)	1.59 (0.96 to 2.22)
Togo	3 (1 to 5)	0.47 (0.2 to 0.83)	84 (38 to 146)	11.89 (5.34 to 20.49)		16 (9 to 25)	0.77 (0.43 to 1.24)	426 (238 to 672)	19.25 (10.91 to 30.29)		1.75 (1.68 to 1.82)	1.68 (1.6 to 1.75)
Tokelau	0 (0 to 0)	1.89 (0.84 to 3.3)	0 (0 to 1)	56.95 (25.89 to 98.43)		0 (0 to 0)	2.46 (1.12 to 3.98)	1 (0 to 1)	73.28 (33.07 to 117.95)		0.86 (0.75 to 0.98)	0.81 (0.69 to 0.93)
Tonga	0 (0 to 1)	1.48 (0.8 to 2.37)	14 (8 to 23)	44.62 (24.64 to 70.81)		1 (0 to 1)	1.77 (0.84 to 3.05)	22 (10 to 37)	51.75 (23.96 to 86.9)		0.32 (0.14 to 0.49)	0.21 (0.04 to 0.39)
Trinidad and Tobago	10 (7 to 14)	2.37 (1.57 to 3.28)	259 (172 to 352)	58.47 (38.77 to 79.39)		34 (22 to 48)	3.39 (2.18 to 4.86)	823 (531 to 1182)	83.64 (53.66 to 120.44)		1.41 (1.24 to 1.57)	1.39 (1.22 to 1.57)
Tunisia	12 (7 to 18)	0.48 (0.29 to 0.75)	310 (188 to 478)	11.96 (7.14 to 18.54)		36 (22 to 55)	0.57 (0.34 to 0.86)	940 (562 to 1446)	14.12 (8.44 to 21.59)		0.57 (0.5 to 0.64)	0.56 (0.5 to 0.62)
Turkey	254 (141 to 385)	1.36 (0.76 to 2.07)	7062 (3875 to 10765)	35.54 (19.62 to 53.85)		579 (327 to 827)	1.24 (0.7 to 1.77)	14622 (8003 to 21220)	30.9 (16.93 to 44.79)		-0.23 (-0.83 to 0.37)	-0.48 (-1.05 to 0.09)
Turkmenistan	12 (8 to 16)	1.06 (0.7 to 1.44)	345 (228 to 473)	29.65 (19.69 to 40.5)		10 (7 to 15)	0.47 (0.3 to 0.67)	323 (207 to 464)	13.57 (8.78 to 19.3)		-3.28 (-4.19 to -2.36)	-3.1 (-4 to -2.18)
Tuvalu	0 (0 to 0)	1.59 (0.66 to 2.79)	2 (1 to 4)	48.23 (21.04 to 83.57)		0 (0 to 0)	2.1 (0.94 to 3.59)	4 (2 to 6)	63.15 (28.34 to 106.32)		0.64 (0.4 to 0.88)	0.61 (0.37 to 0.85)
Uganda	10 (3 to 21)	0.3 (0.08 to 0.66)	266 (75 to 566)	7.46 (2.16 to 16.1)		88 (45 to 140)	1.15 (0.59 to 1.84)	2442 (1251 to 3916)	28.86 (14.69 to 46.05)		5.3 (5.1 to 5.5)	5.26 (5.07 to 5.46)
Ukraine	972 (677 to 1290)	2.09 (1.46 to 2.79)	25204 (17740 to 33234)	56.55 (39.85 to 74.5)		989 (667 to 1346)	2.13 (1.43 to 2.9)	25815 (17409 to 35143)	59.64 (40.41 to 81.5)		-0.53 (-0.96 to -0.1)	-0.41 (-0.86 to 0.05)
United Arab Emirates	1 (1 to 3)	1.01 (0.34 to 2.11)	45 (18 to 87)	25.4 (9.16 to 51.42)		11 (5 to 18)	0.95 (0.36 to 1.8)	406 (184 to 674)	25.09 (10.06 to 45.27)		0.31 (-0.65 to 1.28)	0.34 (-0.4 to 1.08)
United Kingdom	540 (339 to 757)	1.01 (0.65 to 1.42)	11682 (7547 to 16415)	24.5 (15.85 to 34.33)		1029 (680 to 1404)	1.47 (0.97 to 1.99)	21296 (14174 to 28757)	34.55 (23.12 to 46.39)		1.85 (1.65 to 2.05)	1.77 (1.56 to 1.97)
United Republic of Tanzania	33 (14 to 57)	0.6 (0.25 to 1.06)	915 (402 to 1600)	15.12 (6.63 to 26.44)		125 (68 to 190)	1 (0.53 to 1.52)	3518 (1969 to 5299)	25.52 (14.1 to 38.61)		2.15 (1.8 to 2.5)	2.24 (1.87 to 2.62)
United States of America	2539 (1685 to 3420)	1.35 (0.9 to 1.81)	60640 (41261 to 79467)	35.38 (24.23 to 45.93)		5560 (3911 to 6972)	1.81 (1.28 to 2.26)	139472 (100235 to 174928)	49.4 (35.7 to 61.82)		1.18 (1.1 to 1.25)	1.36 (1.29 to 1.44)
United States Virgin Islands	1 (1 to 1)	2.07 (1.29 to 3)	26 (17 to 37)	53.34 (34.15 to 75.81)		2 (2 to 3)	2.29 (1.51 to 3.12)	55 (37 to 77)	56.62 (37.32 to 78.64)		0.43 (0.27 to 0.58)	0.26 (0.1 to 0.43)
Uruguay	23 (13 to 33)	1.01 (0.59 to 1.49)	513 (307 to 754)	24.16 (14.42 to 35.37)		35 (22 to 49)	1.08 (0.7 to 1.5)	712 (473 to 982)	25.16 (16.61 to 34.44)		0.09 (-0.03 to 0.2)	0.05 (-0.04 to 0.14)
Uzbekistan	57 (35 to 81)	0.87 (0.54 to 1.24)	1707 (1068 to 2427)	25.61 (16.15 to 36.17)		167 (109 to 231)	1.24 (0.82 to 1.7)	5929 (3900 to 8303)	39.08 (25.62 to 54.3)		1.19 (1.04 to 1.33)	1.47 (1.29 to 1.64)
Vanuatu	0 (0 to 1)	1.3 (0.56 to 2.37)	13 (6 to 24)	36.93 (16.3 to 68.33)		2 (1 to 3)	1.91 (0.79 to 3.39)	53 (22 to 95)	56.2 (22.91 to 100.12)		1.01 (0.82 to 1.21)	1.09 (0.88 to 1.3)
Venezuela (Bolivarian Republic of)	69 (42 to 100)	1.37 (0.82 to 2)	1889 (1167 to 2730)	35.35 (21.75 to 51.25)		187 (110 to 277)	1.2 (0.71 to 1.79)	4844 (2854 to 7254)	30.53 (17.96 to 45.74)		-0.7 (-1.13 to -0.27)	-0.76 (-1.21 to -0.31)
Viet Nam	18 (4 to 44)	0.08 (0.02 to 0.19)	468 (106 to 1121)	2 (0.46 to 4.77)		123 (51 to 215)	0.23 (0.1 to 0.41)	3281 (1375 to 5906)	5.97 (2.51 to 10.67)		4.78 (4.39 to 5.17)	4.87 (4.45 to 5.29)
Yemen	4 (2 to 9)	0.16 (0.06 to 0.35)	123 (45 to 259)	4.41 (1.6 to 9.43)		21 (10 to 38)	0.3 (0.14 to 0.56)	649 (313 to 1196)	8.25 (3.99 to 15.25)		2.8 (2.52 to 3.07)	2.85 (2.57 to 3.13)
Zambia	9 (3 to 16)	0.62 (0.22 to 1.15)	271 (107 to 500)	16.76 (6.46 to 30.97)		35 (18 to 57)	1.02 (0.53 to 1.62)	1049 (547 to 1699)	27.13 (14.15 to 43.2)		1.58 (1.23 to 1.93)	1.43 (1.06 to 1.8)
Zimbabwe	26 (15 to 38)	1.24 (0.72 to 1.83)	707 (415 to 1035)	31.49 (18.45 to 46.11)		91 (48 to 145)	2.24 (1.18 to 3.55)	2615 (1325 to 4166)	58.57 (29.78 to 92.59)		3.19 (2.61 to 3.79)	3.49 (2.82 to 4.16)
